1 **Impact of MMP-2 and MMP-9 activation on wound healing, tumor growth**  
2 **and RACPP cleavage.**

3  
4 **Authors:** Dina V. Hingorani<sup>1¶</sup>, Csilla N. Lippert<sup>2¶</sup>, Jessica L. Crisp<sup>2</sup>, Elamprakash N. Savariar<sup>2</sup>,  
5 Jonathan P.C. Hasselmann<sup>3</sup>, Christopher Kuo<sup>3</sup>, Quyen T. Nguyen<sup>4</sup>, Roger Y. Tsien<sup>†</sup> Michael A.  
6 Whitney<sup>2</sup> and Lesley G. Ellies<sup>3\*</sup>

7  
8 **Affiliations:**

9 <sup>1</sup>Howard Hughes Medical Institute, UC San Diego, La Jolla, CA 92093-0647, USA

10 <sup>2</sup> Department of Pharmacology, UC San Diego, La Jolla, CA 92093-0647, USA

11 <sup>3</sup> Department of Pathology, UC San Diego, La Jolla, CA 92093-0717, USA.

12 <sup>4</sup> Department of Surgery, UC San Diego, La Jolla, CA 92093-0647 USA

13

14

15 ¶ These authors contributed equally to the manuscript.

16 † Deceased August 24, 2016

17 \*Corresponding author

18 Email: [lellies@ucsd.edu](mailto:lellies@ucsd.edu)

19

20 **Short title: MMP-2/-9 in the tumor microenvironment**

21 **Abstract**

22 Matrix metalloproteinases-2 and -9 (MMP-2/-9) are key tissue remodeling enzymes that have multiple  
23 overlapping activities critical for wound healing and tumor progression *in vivo*. To overcome issues of  
24 redundancy, we created MMP-2/-9 double knockout (DKO) mice in the C57BL/6 background to  
25 examine wound healing. We then bred the DKO mice into the polyomavirus middle T (PyVmT) model of  
26 breast cancer to analyze the role of these enzymes in tumorigenesis. Breeding analyses indicated that  
27 significantly fewer DKO mice were born than predicted by Mendelian genetics and weaned DKO mice  
28 were growth compromised compared with wild type (WT) cohorts. Epithelial wound healing was  
29 dramatically delayed in adult DKO mice and when the DKO was combined with the PyVmT oncogene,  
30 we found that the biologically related process of mammary tumorigenesis was inhibited in a site-specific  
31 manner. To further examine the role of MMP-2/-9 in tumor progression, tumor cells derived from WT or  
32 DKO PyVmT transgenic tumors were grown in WT or DKO mice. Ratiometric activatable cell  
33 penetrating peptides (RACPPs) previously used to image cancer based on MMP-2/-9 activity were  
34 used to understand differences in MMP activity in WT or knockout syngeneic tumors in WT and KO  
35 animals. Analysis of an MMP-2 selective RACPP in WT or DKO mice bearing WT and DKO PyVmT  
36 tumor cells indicated that the genotype of the tumor cells was more important than the host stromal  
37 genotype in promoting MMP-2/-9 activity in the tumors in this model system. Additional complexities  
38 were revealed as the recruitment of host macrophages by the tumor cells was found to be the source of  
39 the tumor MMP-2/-9 activity and it is evident that MMP-2/-9 from both host and tumor is required for  
40 maximum signal using RACPP imaging for detection. We conclude that in the PyVmT model, the  
41 majority of MMP-2/-9 activity in mammary tumors is associated with host macrophages recruited into  
42 the tumor rather than that produced by the tumor cells themselves. Thus therapies that target tumor-  
43 associated macrophage functions have the potential to slow tumor progression.

44

45

46

## 47 **Introduction**

48 Tissue matrix homeostasis is a complex process that is important in normal growth, development and  
49 wound healing. Matrix metalloproteinases-2 and -9 (MMP-2/-9) are members of a family of over 25  
50 zinc-dependent endopeptidases that degrade or cleave a wide range of extracellular proteins including  
51 components of the extracellular matrix (ECM). Proteolysis is regulated at multiple levels, including  
52 transcription, secretion, and conversion of the zymogen (pro-MMP) into an active protease as well as  
53 by the presence of cell type specific tissue inhibitors of metalloproteinases (TIMPs) (1, 2). Elevated  
54 MMP-2/-9 levels are associated with proinflammatory states that can induce or amplify diseases, such  
55 as cardiac disease, arthritis and cancer (3-5), suggesting a role for inhibitors in disease prevention or  
56 treatment.

57 Early efforts to develop therapeutic inhibitors were met with disappointment. This was due to  
58 side effects from insufficiently specific inhibitors as well as an inadequate understanding of the normal  
59 functions of these enzymes and the complex interactions taking place *in vivo* (6, 7). Evidence now  
60 suggests that MMPs act as key nodal components of an interconnected protease web and they can  
61 have opposing effects on the same biological process depending on factors present in the local  
62 microenvironment (8). For example, it is now recognized that many MMPs, including MMP-2/-9, can be  
63 protective in cancer and that their upregulation may be involved in processes aimed at eliminating  
64 abnormal tumor cells. Regardless of the function of MMPs in cancer, fluorescence activatable probes  
65 that rely on MMP activity have been developed to visualize tumor margins and improve surgical  
66 outcomes (9-11).

67 A number of different genetically engineered mouse models have been used to improve our  
68 understanding of the complex interactions occurring between MMPs and their *in vivo*  
69 microenvironments (8, 12, 13). Because MMP-2/-9 have overlapping functions *in vivo*, we used double  
70 mutant mice to study the role of these enzymes in wound healing and tumorigenesis. We also used  
71 imaging probes dependent on MMP-2/-9 activity to identify cell types within tumors where the activity

72 was greatest. Our findings reveal that tumor cells play a critical role in recruiting host stromal cells that  
73 activate MMP-2/-9 *in vivo* in our model system.

74

## 75 **Materials and Methods**

76 Mice - We backcrossed both the MMP2<sup>-/-</sup> (14) and MMP9<sup>-/-</sup> mice (15) (a generous gift from Lisa  
77 Coussens) until they were congenic on an albino C57Bl/6 background. The mice were then mated to  
78 produce MMP-2/-9 double knockout (DKO) mice. Because DKO matings were not fertile, we bred one  
79 DKO with an MMP2<sup>+/+</sup>MMP9<sup>-/-</sup> mate. The DKO and heterozygous/KO mice could be of either sex in the  
80 breeding pair. Wild type (WT) albino C57Bl/6 mice were used as controls for the DKO strain since WT  
81 littermates were not generated in these complex breedings. To examine mammary tumorigenesis, DKO  
82 mice were bred into the polyomavirus middle T (PyVmT) model of mammary tumorigenesis [B6.FVB-  
83 Tg(MMTV-PyVT)634Mul/LelJ; The Jackson Laboratory, Bar Harbor, ME] (16) on an albino C57Bl/6  
84 background. When tumor-bearing animals were euthanized, the tumors and mammary fat pads were  
85 excised and weighed. The mammary fat pads were formalin fixed and stained with carmine as  
86 previously described (16). All animal studies were performed in compliance with the recommendations  
87 in the Guide for the Care and Use of Laboratory Animals of the National Institutes of Health. The  
88 protocols were approved by the Institutional Animal Care and Use Committee of UC San Diego  
89 (Protocol numbers: S01162, S04011). All surgery was performed under isoflurane anesthesia and all  
90 efforts were made to minimize suffering.

91 Wound healing – Bilateral 8 mm full thickness skin incisions were made on the dorsal surface of the  
92 flank on either side of the spine in 6 mice per group. The wound was sutured closed with resorbable  
93 sutures. On day 11, the superficial wound area, including any unhealed scab region, was measured  
94 and the mice were euthanized. The skin was fixed in formalin and paraffin embedded; then, cross-  
95 sections along the initial wound line at approximately the same vertical location were stained with  
96 hematoxylin and eosin (H&E). As an additional measure of wound healing, the distance between  
97 healthy hair follicles on the cross sections was quantified.

98 Real time PCR - Total RNA was isolated from mammary tumors using the RNeasy kit (Qiagen,  
99 Valencia, CA) according to the manufacturer's instructions. First-strand cDNA was synthesized using  
100 an MMLV-Reverse Transcriptase and random hexamers (Promega, Madison, MI) and then amplified  
101 using primers listed in Table S1. Semi-quantitative real time PCR was performed using EvaGreen  
102 SYBR Green mastermix (Fisher Scientific, Houston, TX) in a Step One Plus Real time PCR system  
103 (Applied Biosystems, Grand Island, NY). The gene expression levels were calculated after  
104 normalization to the standard housekeeping genes,  $\beta$  actin and glyceraldehyde 3 phosphate  
105 dehydrogenase (GAPDH), using the  $\Delta\Delta C_T$  method and expressed as the relative mRNA level  
106 compared with the internal control.

107 PyVmT cell lines – Cell lines were derived from PyVmT WT or DKO transgenic tumors in the C57Bl/6  
108 background as previously described (17, 18). Tumor cells ( $10^5$  to  $10^6$ ) were orthotopically injected into  
109 the pectoral mammary glands of adult female mice in 2 mg/ml Matrigel (BD Biosciences, San Jose,  
110 CA). Because the individual cell lines had different growth rates, we injected the cell lines at different  
111 times in an attempt to make the tumors a uniform size for imaging.

112 RACPP cleavage – RACPPs were synthesized using standard solid phase 9-  
113 fluorenylmethyloxycarbonyl (Fmoc) synthesis and characterized as previously reported (19). Briefly, a  
114 fluorescent donor and acceptor are placed onto polycationic and polyanionic domains, respectively, in  
115 sufficient proximity for fluorescence resonance energy transfer (FRET). If the linker between the  
116 polycation and polyanion is cut, typically by a protease, the two halves of the RACPP dissociate,  
117 immediately causing disruption of FRET and a large increase in the ratio of donor to acceptor  
118 emissions. Also the polycation is taken up and retained at or near the site of proteolysis, while the  
119 polyanion is subject to pharmacokinetic washout, reinforcing the high ratio of donor to acceptor  
120 emissions. As described in (19) the cleavable RACPP, with a PLGC(Me)AG linker sequence and  
121 referred to as RACPP1 in the cited paper, could be cut by MMP2 ( $K_{cat}/K_m=36429 \text{ s}^{-1}\text{M}^{-1}$ ), MMP-9  
122 ( $K_{cat}/K_m=13503 \text{ s}^{-1}\text{M}^{-1}$ ), and somewhat by MMP14 ( $K_{cat}/K_m=17173 \text{ s}^{-1}\text{M}^{-1}$ ), whereas the uncleavable  
123 control RACPP was resistant to such cleavage (19, 20). We also synthesized an RACPP with a

124 cleavable sequence TLSLEH in the manner described above. This sequence is selective for MMP2  
125 ( $K_{cat}/K_m=11405 \text{ s}^{-1}\text{M}^{-1}$ ) and slightly cleaved by MMP14 ( $K_{cat}/K_m=1200 \text{ s}^{-1}\text{M}^{-1}$ ) uncleaved by the  
126 related gelatinase MMP9. WT and DKO breast cancer cells ( $10^5$  to  $10^6$  in 2 mg/ml Matrigel) were  
127 orthotopically injected into the mammary fat pads of albino C57BL/6 WT and DKO mice. When both the  
128 WT and DKO tumors were palpable, 10nmol of RACPPs was dissolved in 100 $\mu$ l sterile water  
129 (Conc=100uM) and administered intravenously (retroorbital) while mice were under isoflurane  
130 anesthesia. Two hours after peptide administration, mice were euthanized by isoflurane overdose and  
131 then cervical dislocation. The skin was removed and mice were imaged as previously described (19).  
132 Briefly, Cy5 was excited at 620/20 nm and the emission intensity was measured in 10-nm increments,  
133 ranging from 640-680 nm, through a tunable crystal emission filter. Numerator (Cy5) and denominator  
134 (Cy7) values were generated by integrating the spectral images over 660-720 nm and 760-830 nm,  
135 respectively. Custom software divided the Cy5 emission by the Cy7 emission to create a pseudocolor  
136 ratio value image, ranging from blue (lowest ratio) to red (highest ratio). Ratios were quantitated using  
137 ImageJ. To compare the data from two independent sets of experiments in albino C57BL/6 mice, the  
138 ratios were normalized, adjusting the values for each separate experiment by dividing each ratio value  
139 by the lowest ratio for that experiment of mice (as a result, the lowest ratio for each experiment was set  
140 to one).

141 Immunofluorescence - Perfusion fixed py8119-lentiGFP tumor samples from mice that were treated  
142 with Cy5: Cy7 RACPP were suspended in 20% sucrose solution overnight at 4C prior to embedding in  
143 OCT solution. 10 $\mu$ m sections were made and treated with a 1:1000 dilution of Alexa405 conjugated  
144 primary antibody to F4/80 marker for macrophages (Abcam, Cambridge, UK). The slides were placed in  
145 a humifier chamber overnight at 4C followed by washes with PBS and coverslipped. Three color  
146 confocal imaging was performed using the Nikon A1 system with laser lines 405nm, 488nm and  
147 640nm.

148 Immunohistochemistry - To further determine whether the tumor cells or host stroma contributed more  
149 to the MMP-2/-9-cleavable RACPP ratios, we cryosectioned (10  $\mu$ m) and then imaged the tumors

150 harvested from the C57Bl/6 experiment using a confocal microscope (Nikon Instruments Inc, Melville,  
151 NY). Additional sections (5  $\mu$ m) were stained for neutrophils using the NIMP-R14 antibody (Abcam,  
152 Cambridge, UK) with standard immunohistochemical (IHC) methods. Since macrophages are a major  
153 source of MMP-2/-9 activity, we examined their infiltration into tumors. Formalin fixed, paraffin  
154 embedded tumor samples were sectioned at 7  $\mu$ m and stained with the F4/80 antibody (BM8;  
155 eBioscience, San Diego, CA, dilution 1:200) following antigen retrieval in citrate buffer pH 6.0, 0.05%  
156 tween 20. Antibody visualization was with ImmPACT DAB staining (Vector Laboratories Inc,  
157 Burlingame, CA). Slides were scanned using a Nanozoomer and analyzed using Aperio Imagescope  
158 software (Leica Biosystems Inc, Buffalo Grove, IL).

159 Statistics – Breeding results were analyzed using the Chi-square test. Normally distributed data were  
160 analyzed using the Student's t test or by ANOVA followed by multiple comparisons using the Holm-  
161 Sidak correction. They are presented as means  $\pm$  SEM. Nonparametric data were analyzed using the  
162 Mann-Whitney test. All data were analyzed using Graphpad Prism software (Graphpad Prism, La Jolla,  
163 CA).

164

## 165 **Results and Discussion**

### 166 Reduced fecundity and compromised growth in DKO mice

167 Given the fundamental roles that MMP-2/-9 play in tissue homeostasis, it is reasonable to hypothesize  
168 that a loss of both enzymes could result in reduced fertility and offspring viability. Furthermore, while it  
169 has been shown that MMP-2 deficiency does not affect breeding success (14), the loss of MMP-9  
170 results in smaller litter sizes and an increased percentage of infertile breeding pairs (21). However,  
171 these changes do not appear to be due to impaired embryonic and fetal development as heterozygous  
172 matings resulted in the expected Mendelian frequencies of MMP9<sup>+/+</sup>, MMP9<sup>+/-</sup> and MMP9<sup>-/-</sup> mice (15,  
173 22). Similarly, we observed a reduced litter size in our DKO mice as follows: WT breeding 6.27 pups  $\pm$   
174 0.31 vs DKO breeding 4.76 pups  $\pm$  0.31 (mean  $\pm$  SEM,  $p < 0.001$ ). However, only 70% of the DKO mice  
175 that were expected according to Mendelian ratios survived to weaning (Table S1). These results

176 indicate a significant functional overlap between the two enzymes in reproduction such that the DKO  
177 exacerbates the MMP-9 null phenotype, skewing the normal Mendelian ratios and reducing the number  
178 of viable DKO mice.

179 Although no significant difference in survival of weaned male and female DKO mice was  
180 observed, we found mild but significant early growth retardation in DKOs of both sexes (Figure S1),  
181 which has not been observed in single KO mice. Male DKO mice were more compromised at an early  
182 age compared with their WT counterparts (~57% reduction in body weight at 3-6 weeks, recovering to  
183 86% by 12 weeks; Figure S1A) than female DKO mice (~84% reduction in body weight from week 6;  
184 Figure S1B), underscoring the important role MMP-2/-9 play in normal development.

185

#### 186 DKO mice have delayed wound healing

187 At a cellular level, wound healing has much in common with normal development, and numerous  
188 studies suggest that MMP-2/-9 play active roles in this process (23). Accordingly, we observed a delay  
189 in primary wound healing in DKO mice compared with WT mice. First, at 11 days post-incision, wound  
190 areas for the DKO mice were significantly larger ( $9.67 \pm 2.09 \text{ mm}^2$ ) than those for the WT mice ( $0.12 \pm$   
191  $0.03 \text{ mm}^2$ ; mean  $\pm$  SEM,  $p < 0.001$ ;  $n = 6$  mice [total of 12 wounds] per group) (Figure 1A-B).  
192 Additionally, even though two vertical incisions were made to create the wound, the scab area that  
193 formed as part of the wound healing process crossed from one incision side to the other for some DKO  
194 mice (Figure 1A), while the WT mice were almost completely healed by Day 11. This may be attributed  
195 to a number of factors that occur during the healing period. First, although MMP expression in healthy  
196 skin is low (24), MMP-9 expression can be induced at the leading edge of migrating epithelial cells,  
197 enabling these cells to move through the ECM and re-epithelialize the wounded area (25-28). MMP  
198 expression can also be upregulated in inflammatory cells, such as macrophages, T cells and  
199 eosinophils, which infiltrate the wound and assist with pathogen clearance (29, 30). There is a complex  
200 pattern of expression involving high MMP-9 expression in the early inflammatory phase and a later  
201 increase in MMP-2 expression that occurs during the proliferative phase of wound repair (31). MMP-2 is



202 also found in immune cells and it promotes functional recovery after spinal cord injury (32). Consistent  
203 with previous work, delayed wound healing in DKO compared to WT mice in our study was associated  
204 with aberrant re-epithelialization of the injured area, however further study is needed to clarify the  
205 overlapping mechanistic roles of MMP-2/-9 in wound healing.

206

207 **Figure 1. Delayed wound healing in DKO mice.** A. Representative WT and DKO mice on Day 11  
208 following the creation of bilateral, vertical, 8-mm wounds. The initial wounds were located as indicated  
209 by the arrows in the WT panel, with aberrant healing in the DKO apparent. B. Quantitation of the day 11  
210 skin surface wound area (n = 6 mice and 12 wounds per group). C. H&E stained cross-sections of skin  
211 from WT and DKO mice at day 11 after wounding with wound margins indicated by dashed lines. D.  
212 Quantitation of the distance between healthy hair follicles adjacent to the wound (n = 2 – 3 sections per  
213 wound; 12 wounds per group). Data are means  $\pm$  SEM, analyzed by Student's t test. \*\*\* p < 0.001.

214

215 To evaluate wound healing at the microscopic level, we measured the distance between healthy  
216 hair follicles. The distance between hair follicles was significantly larger for the DKO mice than for the  
217 WT mice ( $3.74 \pm 0.3$  mm v.  $0.70 \pm 0.13$  mm; mean  $\pm$  SEM, p < 0.001; n = 12 wounds/group) (Figure 1C-  
218 D), indicating that wound healing had not progressed normally for the DKO mice. Interestingly, wound  
219 healing in a model of laser-induced choroidal neovascularization, mimicking human age-related  
220 macular degeneration, is nearly completely prevented in DKO mice, while the wound healing in single  
221 KOs is only partially impaired (33). This is thought to be due to an effect of MMP-2/-9 on fibrinolysis,  
222 which supports angiogenesis. Thus, inadequate vascularization may also play a role in our observation  
223 of impaired wound healing.

224

#### 225 Site-specific effect on tumor growth

226 Since MMP-2/-9 have long been associated with cancer progression either through their effects on  
227 matrix degradation or as regulators of growth factor and cytokine bioactivity (34), we next examined

228 their role in tumor growth in the PyVmT transgenic mouse model of breast cancer (16, 35). Due to the  
229 complex breeding and relatively poor breeding success in generating PyVmT positive DKO female  
230 mice, we had a limited number of mice in this study. We used semi-quantitative real time PCR to  
231 confirm the loss of MMP-2/-9 expression. Our analysis verified that the only enzymes that were  
232 significantly downregulated in our panel of 20 MMPs were MMP-2 and MMP-9, although there was an  
233 interesting trend towards downregulation of a number of other MMPs in the absence of active MMP-2/-  
234 9. Additionally, we were unable to identify RNA from any alternative MMPs that were upregulated to  
235 compensate for the loss of MMP-2/-9 in the DKO mice compared to WT mice (Figure S2).

236 While no significant difference in the overall tumor burden between the PyVmT;WT and  
237 PyVmT;DKO mice was found (Figure 2A), our analysis showed a slight, but significant, reduction in  
238 tumor growth in the #4 mammary fat pad ( $0.431 \pm 0.074$  g v.  $0.136 \pm 0.051$  g; mean  $\pm$  SEM,  $p < 0.05$ )  
239 (Figure 2B). This difference could be visualized in whole mounts of the #4 mammary gland at 24 weeks  
240 of age, which showed a reduction in the amount of carmine stained mammary epithelial tissue in the  
241 PyVmT;DKO gland (Figure 2C). Interestingly, iNOS<sup>-/-</sup> mice show a similar site-specific reduction in  
242 mammary tumor growth in the inguinal fat pads (16), which are the largest of the mammary fat pads  
243 and contain a central lymph node. Since MMP-2/-9 and iNOS are key effectors of macrophages, we  
244 further investigated whether this growth retardation was primarily due to loss of MMP activity in the  
245 tumor cells or stromal cells particularly macrophages, using an orthotopic tumor cell injection model.

246

247 **Figure 2. Modest effect of DKO on mammary tumorigenesis.** A. Comparison of tumor burden in  
248 PyVmT;WT (N = 10) and PyVmT;DKO mice (N = 5) aged 22-25 weeks. B. Tumor burden by mammary  
249 gland site from pectoral (#1, 2, 3) to inguinal (#4, 5). Data are means  $\pm$  SEM analyzed by Student's t  
250 test, \*  $p < 0.05$ . C. Whole mounts of the #4 inguinal mammary glands indicate delayed tumorigenesis in  
251 the DKO.

252

253 The results of orthotopic tumor cell injections supported a role for MMP-2/-9 in tumor growth. In  
254 one set of C57BL/6 mice used for imaging (Figure 3A), we recorded the tumor weights and observed  
255 the highest tumor weight for the WT tumor in WT mice ( $0.355 \pm 0.09$  g; mean  $\pm$  SEM,  $p < 0.05$   
256 compared to WT tumors in DKO mice,  $0.07 \pm 0.06$  g, DKO tumors in WT mice,  $0.07 \pm 0.03$  g and DKO  
257 tumors in DKO mice,  $0.07 \pm 0.02$  g) (Figure 3C). The WT tumor cell-stroma combination resulted in  
258 tumors that were almost 5-fold larger than any of the other combinations: WT tumors in DKO mice;  
259 DKO tumors in WT mice; and DKO tumors in DKO mice, suggesting that loss of MMP-2/-9 activity in  
260 either the tumor cells or the host stroma could reduce tumor growth. Based on these data, we posited  
261 that both the tumor and host stroma require MMP-2/-9 to promote tumor growth, resulting in a larger  
262 tumor size. It merits noting that in other experiments, the WT tumors were injected after the DKO  
263 tumors were already palpable. This was because the WT tumor cell line had a faster growth rate *in vitro*  
264 and *in vivo* than the DKO tumor cells, which is consistent with a tumor cell growth-promoting role for  
265 MMP-2/-9 in this strain.

266

267 **Figure 3. The tumor cell genotype contributes more than the stromal genotype to MMP-2/-9**  
268 **activity in cleaving the MMP-2/-9-cleavable RACPP.** A. C57BL/6 mice (WT and DKO) with orthotopic  
269 WT and DKO tumors (T) in their bilateral mammary fat pads. After 2 h incubation with an intravenously  
270 administered MMP-2/-9-cleavable RACPP, the tumors were imaged. B. The tumor ratios (Cy5  
271 emission/Cy 7 emission, corresponding to cleaved/uncleaved ACPP) were quantified (N = 5  
272 mice/group; N = 7 tumors/group). The data from two sets of independent experiments, which had the  
273 same relative comparison between tumor groups with different overall ratio ranges, were normalized so  
274 the sets could be combined. Each set was normalized to its lowest ratio (all values divided by the  
275 lowest ratio value) such that the lowest ratio for each set was re-mapped onto the value one. C. The  
276 tumor weights from one of the C57BL/6 mouse strain experiments; the weight was highest for the WT-  
277 tumor (T) in WT-mouse (M). Data are means  $\pm$  SEM analyzed by one-way ANOVA and Holm-Sidak's  
278 multiple comparisons test. D. Ratiometric images Cy5/Cy7 2 h after intravenous injection of MMP-2

279 selective RACPP, with cleavable sequence TLSLEH, in WT, 2KO (N = 4 mice per WT or KO group; N =  
280 8 tumors/group) and DKO mice (N = 3 mice/group; N = 6 tumors/DKO group). In each mouse, the WT  
281 tumor is on the left and the DKO tumor is on the right. E. Quantified tumor ratios of Cy5 emission/Cy7  
282 emission for the cohort of 11 mice imaged with the MMP2-selective RACPP, stratified by tumor type  
283 and mouse strain.

284

285 MMP-2/-9 tumor cell genotypes contribute more than stromal genotypes to RACPP cleavage.

286 RACPPs and, more recently, RACPPs, have proven useful in detecting protease activity in cancer (9, 11,  
287 36, 37). A role for stromal-derived MMPs in cancer progression has become increasingly apparent as  
288 MMP expression is frequently higher in stromal cells than tumor cells (38) and MMP-2/-9 expression  
289 can be increased in stromal cells by paracrine stimulation or direct contact with malignant tumor  
290 epithelium (39). We applied this technology to our tumor cell injection model in a 4-way comparison  
291 (WT tumor cells in WT mice; DKO tumor cells in WT mice; WT tumor cells in DKO mice; and DKO  
292 tumor cells in DKO mice) to study the contribution of MMP-2/-9 stromal versus tumor cell activity in  
293 more detail (Figure 3A). The normalized Cy5/Cy7 ratio for the WT tumors in WT mice ( $1.87 \pm 0.11$ ; 5  
294 mice with 7 tumors/group) was significantly higher than the ratio for the DKO tumors in WT mice ( $1.34 \pm$   
295  $0.07$ ;  $p < 0.003$ ) or the DKO tumors in DKO mice ( $1.20 \pm 0.08$ ;  $p < 0.0002$ ). The WT tumors in DKO  
296 mice ( $1.67 \pm 0.11$ ) also had significantly higher ratios than the DKO tumors in DKO mice ( $p < 0.008$ ).  
297 The difference in ratios between the DKO tumors in WT mice and WT tumors in DKO mice did not quite  
298 reach significance ( $p < 0.06$ ). The WT tumors in WT mice did not have significantly higher ratios than the  
299 WT tumors in DKO mice ( $p = 0.25$ ), nor did the DKO tumors in WT mice have significantly higher ratios  
300 than the DKO tumors in DKO mice ( $p = 0.31$ ) (Figure 3B), suggesting that a tumor cell's ability to  
301 activate MMP-2/-9 is more important than the host genotype to the imaging ratio. Measurement of the  
302 tumor weights indicated that MMP-2/-9 play an important role in tumor growth (Figure 3C), which is not  
303 surprising given their role in cellular migration and angiogenesis (40).

304 Since the DKO tumors grew at a slower rate than the WT tumors, we carried out experiments in  
305 which we injected the WT tumor cells when the DKO tumor was just palpable. We tested an MMP-2  
306 selective RACPP (cleavable sequence TLSLEH) in WT, 2KO and DKO mice and found that loss of  
307 MMP-2 in the host significantly reduced cleavage of the probe, validating the selectivity of this cleavage  
308 sequence (Figure 3D,E). WT tumors, regardless of mouse genotype, showed high Cy5/Cy7 ratios  
309 owing to cleavage of the MMP-2 selective sequence; the WT groups and their ratios were: WT tumor in  
310 WT mice ( $5.3 \pm 0.35$ ); WT tumor in 2KO mice ( $5.3 \pm 0.53$ ) and WT tumor in DKO mice ( $5.2 \pm 0.61$ ).  
311 These data support the involvement of tumor derived MMP-2 in promoting high cleavage of the MMP-2  
312 selective RACPP. However, a comparison of WT tumor ( $5.3 \pm 0.35$ ) and DKO tumor ( $4.8 \pm 0.17$ ) ratios  
313 in WT mice show statistically significant difference when either ratio is compared with the Cy5/Cy7 ratio  
314 in DKO tumor in DKO mice ( $3.6 \pm 0.29$ ,  $p < 0.01$ ). These data indicate there is a contribution from host  
315 MMPs. Overall, our data suggest that the tumor cell genotype contributes more than the stromal  
316 genotype to the detection ratios we observed for the MMP-2/-9-cleavable RACPPs in tumors.

317

#### 318 Host stroma influences the tumor ratio at a microscopic level

319 The importance of MMP-2/-9 in the tumor cells was more apparent at the microscopic level, as WT  
320 tumor cells implanted in WT mice had higher ratios than those implanted in DKO mice ( $4.35 \pm 0.25$  and  
321  $3.34 \pm 0.24$ , respectively,  $p = 0.01$ ), indicating that more subtle differences could be detected with  
322 higher magnification (Figure 4A,B). In contrast, the ratios for DKO tumors in either WT or DKO mice  
323 were not significantly different ( $2.13 \pm 0.12$  and  $2.16 \pm 0.13$ , respectively;  $p = 0.87$ ). MMP-2/-9  
324 expression in mammary carcinoma cells is associated with epithelial to mesenchymal transition and  
325 increased tumor cell invasiveness (41), so it is not surprising that our invasive WT cell line affects the  
326 RACPP ratios more than the DKO cell line. Importantly, our RACPP findings were consistent at both  
327 the macroscopic and microscopic levels. MMP-2/-9 activatable RACPPs coupled with  
328 chemotherapeutic agents have been shown to be effective in reducing breast cancer burden in animal

329 models (42). Our results suggest this efficacy is due in part to the ability of these agents to target both  
330 tumor cells and their associated tumor-promoting stroma.

331 In addition to examining the ratios at a microscopic level, we examined the tumor morphology  
332 after H&E staining and found that while the WT tumors were dense with tumor cells, the DKO tumors  
333 had a looser tissue organization (Figure 4A). The differences in growth rates, which reflect tumor  
334 heterogeneity and different mammary tumor subtypes explains the differences in their morphology (18).

335

336 **Figure 4. At the microscopic level, the host stroma enhances the WT-T ratio.** A. The ratios for  
337 tumor sections (10  $\mu$ m; WT-T in WT-M and DKO-M and DKO-T in WT-M and DKO-M) were evaluated  
338 with confocal microscopy and then the tissue sections were stained with H&E to examine the  
339 morphology. B. Quantitation of the ratios corresponding to 4 – 6 confocal images per group. Data are  
340 means  $\pm$  SEM analyzed by one-way ANOVA and Sidak's multiple comparisons test.

341

342 Since the infiltrating cells had the morphology of macrophages, we carried out experiments in  
343 which Py8119GFP tumors were injected with RACPPs and later stained with the macrophage marker  
344 F4/80 (Figure 5A). We found that indeed, the cells with high RACPP signal at the periphery of the  
345 tumors were macrophages (Figure G,H). Macrophages were distributed throughout the stromal areas  
346 surrounding the tumor cells and showed accumulation of RACPP (Figure 5B-D). RACPP positive  
347 macrophages present in the center of the tumors showed less cleavage, likely due to reduced MMP-2/-  
348 9 activity (Figure 5I-J). At higher magnification, we were able to clearly show that the tumor cells were  
349 also positive for RACPP, but at a lower intensity than the macrophages (Figure 5E-L). However,  
350 because of the abundance of the tumor cells, they contribute significantly to the total RACPP signal  
351 observed (Figure E,F). Our data indicate that RACPPs are useful tools to localize MMP-2/-9 activity in  
352 vivo and confirm that MMP-2/-9 activity is present in both tumor cells and macrophages.

353

354 **Figure 5. RACPP ratios are higher in macrophages than tumor cells.**

355 A. Immunofluorescence staining with F4/80 pan macrophage antibody marker (yellow) on Py8119-GFP  
356 (green) tumor tissue excised from C57Bl6-albino mice injected with MMP cleavable RACPP (Cy5: red).  
357 B. Macrophage infiltration surrounding tumor cells. C. Macrophage distribution in the tissue and D.  
358 overlay with Cy5 from cleaved RACPP due to MMP-2/-9 activity. E,F. Much of the Cy5 from cleaved  
359 RACPP is seen in stromal region surrounding tumor cells with dimmer puncta seen on the Cy5 image  
360 alone. G,H. Higher magnification images demonstrating high Cy5 signal in the macrophages at the  
361 tumor periphery rather than I, J. those at the tumor center . K,L. Higher magnification showing  
362 accumulation of Cy5 from cleaved RACPP in the tumor cells.

363

364 To further understand the ratio enhancement for WT tumors in WT mice (v. DKO mice), we  
365 quantitated the number of macrophages infiltrating the tumors. As expected, the majority of the  
366 infiltration was at the periphery of the tumor and WT tumor cells had a significantly greater ability to  
367 recruit host macrophages into the tumor than DKO tumor cells (Figure 6A-F). Interestingly, a lack of  
368 MMP-2 or MMP-2/-9 in the host tissues reduced the effectiveness of WT tumor cells in recruiting  
369 macrophages (Figure 6G), which is possibly due to a motility defect in the KO macrophages. DKO mice  
370 also failed to recruit macrophages in the choroidal neovascularization model although the mechanism  
371 was not determined (33). The effects of the KO mice on macrophage recruitment into WT tumors was  
372 less prominent in the tumor center (Figure 6H), possibly due to the presence of a subpopulation of  
373 macrophages that were not dependent on MMP-2/-9 for motility. Overall, our results in mouse  
374 mammary tumors are consistent with previous studies showing that human colorectal cancer cells  
375 induce stromal macrophage MMP-2/-9 production (43, 44).

376

377 **Figure 6. Tumor associated macrophage (TAM) infiltration is modulated by MMP-2/-9.** Panels A-F  
378 are representative sections stained with F4/80 to identify TAM infiltration in the various tumor cell/host  
379 mouse genotype combinations. A. WT-T in WT mouse. B. WT-T in 2KO mouse. C. WT-T in DKO  
380 mouse. D. DKO-T in WT mouse. E. DKO-T in 2KO mouse. F. DKO-T in DKO mouse. Scale bar 100



381  $\mu\text{m}$ . G. Macrophage infiltration at the periphery (0.5 mm into the tumor). H. Macrophage infiltration into  
382 the center of the tumor (1 mm in from the tumor boundary). N = 6-8 tumors per condition. Data are  
383 means  $\pm$  SEM.

384

385 We also evaluated the number of neutrophils, which produce MMP-2/-9, in tumor sections  
386 (Figure S3). Neutrophils were a potential candidate cell type contributing to additional activity in the WT  
387 tumor in WT mice because neutrophils secrete MMP-9 without tissue inhibitor metalloproteinase 1  
388 (TIMP-1), whereas many other cell types secrete MMP-9 and TIMP-1 together(45). Neutrophil counts  
389 had a trend towards higher levels in WT mice than DKO mice ( $16.21 \pm 4.05$  v.  $8.25 \pm 2.06$  neutrophils /  
390  $\text{mm}^2$ ,  $p < 0.07$ ), but it was clear that macrophages were the major myeloid cells present in the tumors.

391

## 392 **Conclusions**

393 Our data comparing WT and DKO mice confirm an important role for MMP-2/-9 in wound  
394 healing and tumorigenesis. In the *in vivo* tumor microenvironment, our data show that the majority of  
395 MMP-2/-9 activity is associated with the tumor cell genotype in our model system. The complex  
396 interplay between tumor cells and host cells is exemplified by the data indicating that WT host  
397 macrophages recruited by WT tumor cells play an important role in RACPP cleavage. While a new  
398 generation of more specific MMP-2/-9 inhibitors has been developed and is undergoing clinical trials  
399 (7), several alternative strategies targeting macrophage activity have been proposed. Exploiting drugs  
400 that inhibit macrophage recruitment into tumors (46), harnessing macrophage  $\text{Fc } \gamma \text{ R}$ -mediated  
401 processing for local delivery of antibody-drug conjugates (47), or macrophage mediated drug delivery to  
402 the tumor's extracellular matrix (47) may prove beneficial in slowing tumor progression. RACPP-drug  
403 conjugates can be selectively delivered to tumors (42, 48) and our results confirm that they can be  
404 processed both in tumor cells and tumor-associated macrophages to provide therapeutic benefits.

405



406 **Acknowledgments**

407 We thank Kathryn Talisman for animal husbandry and Paul Steinbach for assistance with imaging. This  
408 work was supported by NIH grants K22CA118182 (LGE), R01CA158448 (RYT), and P30NS047101  
409 (UCSD Microscopy Core).

410

411 **Competing interests:**

412 M. Whitney and Q. Nguyen are scientific advisors to Avelas Biosciences, which has licensed the ACP  
413 technology from the University of California Regents. The authors declare that they have no other  
414 competing interests.

415

416

417 **References**

- 418 1. Ra HJ, Parks WC. Control of matrix metalloproteinase catalytic activity. *Matrix Biol.*  
419 2007;26(8):587-96.
- 420 2. Arpino V, Brock M, Gill SE. The role of TIMPs in regulation of extracellular matrix proteolysis.  
421 *Matrix Biol.* 2015;44-46:247-54.
- 422 3. Spinale FG, Villarreal F. Targeting matrix metalloproteinases in heart disease: lessons from  
423 endogenous inhibitors. *Biochem Pharmacol.* 2014;90(1):7-15.
- 424 4. Egeblad M, Werb Z. New functions for the matrix metalloproteinases in cancer progression. *Nat*  
425 *Rev Cancer.* 2002;2(3):161-74.
- 426 5. Murphy G, Knauper V, Atkinson S, Butler G, English W, Hutton M, et al. Matrix  
427 metalloproteinases in arthritic disease. *Arthritis Res.* 2002;4 Suppl 3:S39-49.
- 428 6. Coussens LM, Fingleton B, Matrisian LM. Matrix metalloproteinase inhibitors and cancer: trials  
429 and tribulations. *Science.* 2002;295(5564):2387-92.
- 430 7. Piperigkou Z, Manou D, Karamanou K, Theocharis AD. Strategies to Target Matrix  
431 Metalloproteinases as Therapeutic Approach in Cancer. *Methods Mol Biol.* 2018;1731:325-48.
- 432 8. Rodriguez D, Morrison CJ, Overall CM. Matrix metalloproteinases: what do they not do? New  
433 substrates and biological roles identified by murine models and proteomics. *Biochim Biophys Acta.*  
434 2010;1803(1):39-54.
- 435 9. Nguyen QT, Olson ES, Aguilera TA, Jiang T, Scadeng M, Ellies LG, et al. Surgery with  
436 molecular fluorescence imaging using activatable cell-penetrating peptides decreases residual cancer  
437 and improves survival. *Proc Natl Acad Sci U S A.* 2010;107(9):4317-22.
- 438 10. Chi C, Zhang Q, Mao Y, Kou D, Qiu J, Ye J, et al. Increased precision of orthotopic and  
439 metastatic breast cancer surgery guided by matrix metalloproteinase-activatable near-infrared  
440 fluorescence probes. *Sci Rep.* 2015;5:14197.
- 441 11. Metildi CA, Felsen CN, Savariar EN, Nguyen QT, Kaushal S, Hoffman RM, et al. Ratiometric  
442 activatable cell-penetrating peptides label pancreatic cancer, enabling fluorescence-guided surgery,

- 443 which reduces metastases and recurrence in orthotopic mouse models. *Annals of surgical oncology*.  
444 2015;22(6):2082-7.
- 445 12. Fanjul-Fernandez M, Folgueras AR, Cabrera S, Lopez-Otin C. Matrix metalloproteinases:  
446 evolution, gene regulation and functional analysis in mouse models. *Biochim Biophys Acta*.  
447 2010;1803(1):3-19.
- 448 13. Wieczorek E, Jablonska E, Wasowicz W, Reszka E. Matrix metalloproteinases and genetic  
449 mouse models in cancer research: a mini-review. *Tumour biology : the journal of the International*  
450 *Society for Oncodevelopmental Biology and Medicine*. 2015;36(1):163-75.
- 451 14. Itoh T, Ikeda T, Gomi H, Nakao S, Suzuki T, Itohara S. Unaltered secretion of beta-amyloid  
452 precursor protein in gelatinase A (matrix metalloproteinase 2)-deficient mice. *J Biol Chem*.  
453 1997;272(36):22389-92.
- 454 15. Vu TH, Shipley JM, Bergers G, Berger JE, Helms JA, Hanahan D, et al. MMP-9/gelatinase B is  
455 a key regulator of growth plate angiogenesis and apoptosis of hypertrophic chondrocytes. *Cell*.  
456 1998;93(3):411-22.
- 457 16. Davie SA, Maglione JE, Manner CK, Young D, Cardiff RD, MacLeod CL, et al. Effects of  
458 FVB/NJ and C57Bl/6J strain backgrounds on mammary tumor phenotype in inducible nitric oxide  
459 synthase deficient mice. *Transgenic Res*. 2007;16(2):193-201.
- 460 17. Biswas T, Gu X, Yang J, Ellies LG, Sun LZ. Attenuation of TGF-beta signaling supports tumor  
461 progression of a mesenchymal-like mammary tumor cell line in a syngeneic murine model. *Cancer*  
462 *letters*. 2014;346(1):129-38.
- 463 18. Bao L, Cardiff RD, Steinbach P, Messer KS, Ellies LG. Multipotent luminal mammary cancer  
464 stem cells model tumor heterogeneity. *Breast Cancer Res*. 2015;17(1):137.
- 465 19. Savariar EN, Felsen CN, Nashi N, Jiang T, Ellies LG, Steinbach P, et al. Real-time in vivo  
466 molecular detection of primary tumors and metastases with ratiometric activatable cell-penetrating  
467 peptides. *Cancer Res*. 2013;73(2):855-64.

- 468 20. Felsen CN, Savariar EN, Whitney M, Tsien RY. Detection and monitoring of localized matrix  
469 metalloproteinase upregulation in a murine model of asthma. *Am J Physiol Lung Cell Mol Physiol*.  
470 2014;306(8):L764-74.
- 471 21. Dubois B, Arnold B, Opdenakker G. Gelatinase B deficiency impairs reproduction. *J Clin Invest*.  
472 2000;106(5):627-8.
- 473 22. Dubois B, Masure S, Hurtenbach U, Paemen L, Heremans H, van den Oord J, et al. Resistance  
474 of young gelatinase B-deficient mice to experimental autoimmune encephalomyelitis and necrotizing tail  
475 lesions. *J Clin Invest*. 1999;104(11):1507-15.
- 476 23. Chen P, Parks WC. Role of matrix metalloproteinases in epithelial migration. *J Cell Biochem*.  
477 2009;108(6):1233-43.
- 478 24. Loffek S, Schilling O, Franzke CW. Series "matrix metalloproteinases in lung health and  
479 disease": Biological role of matrix metalloproteinases: a critical balance. *Eur Respir J*. 2011;38(1):191-  
480 208.
- 481 25. Lund LR, Romer J, Bugge TH, Nielsen BS, Frandsen TL, Degen JL, et al. Functional overlap  
482 between two classes of matrix-degrading proteases in wound healing. *Embo J*. 1999;18(17):4645-56.
- 483 26. Romer J, Lund LR, Eriksen J, Pyke C, Kristensen P, Dano K. The receptor for urokinase-type  
484 plasminogen activator is expressed by keratinocytes at the leading edge during re-epithelialization of  
485 mouse skin wounds. *J Invest Dermatol*. 1994;102(4):519-22.
- 486 27. Soo C, Shaw WW, Zhang X, Longaker MT, Howard EW, Ting K. Differential expression of  
487 matrix metalloproteinases and their tissue-derived inhibitors in cutaneous wound repair. *Plast Reconstr*  
488 *Surg*. 2000;105(2):638-47.
- 489 28. Kyriakides TR, Wulsin D, Skokos EA, Fleckman P, Pirrone A, Shipley JM, et al. Mice that lack  
490 matrix metalloproteinase-9 display delayed wound healing associated with delayed reepithelization and  
491 disordered collagen fibrillogenesis. *Matrix Biol*. 2009;28(2):65-73.
- 492 29. Leppert D, Waubant E, Galardy R, Bunnett NW, Hauser SL. T cell gelatinases mediate  
493 basement membrane transmigration in vitro. *J Immunol*. 1995;154(9):4379-89.

- 494 30. Okada S, Kita H, George TJ, Gleich GJ, Leiferman KM. Migration of eosinophils through  
495 basement membrane components in vitro: role of matrix metalloproteinase-9. *Am J Respir Cell Mol*  
496 *Biol.* 1997;17(4):519-28.
- 497 31. McLennan SV, Min D, Yue DK. Matrix metalloproteinases and their roles in poor wound healing  
498 in diabetes. *Wound Practice and Research.* 2008;16(3):116-21.
- 499 32. Hsu JY, McKeon R, Goussev S, Werb Z, Lee JU, Trivedi A, et al. Matrix metalloproteinase-2  
500 facilitates wound healing events that promote functional recovery after spinal cord injury. *J Neurosci.*  
501 2006;26(39):9841-50.
- 502 33. Lambert V, Wielockx B, Munaut C, Galopin C, Jost M, Itoh T, et al. MMP-2 and MMP-9  
503 synergize in promoting choroidal neovascularization. *FASEB J.* 2003;17(15):2290-2.
- 504 34. Tauro M, McGuire J, Lynch CC. New approaches to selectively target cancer-associated matrix  
505 metalloproteinase activity. *Cancer Metastasis Rev.* 2014;33(4):1043-57.
- 506 35. Guy C, Cardiff R, Muller W. Induction of mammary tumors by expression of polyomavirus middle  
507 T oncogene: a transgenic mouse model for metastatic disease. *Mol Cell Biol.* 1992;12:954-61.
- 508 36. Savariar EN, Felsen CN, Nashi N, Jiang T, Ellies LG, Steinbach P, et al. Real-time in vivo  
509 molecular detection of primary tumors and metastases with ratiometric activatable cell-penetrating  
510 peptides. *Cancer research.* 2013;73(2):855-64.
- 511 37. Olson ES, Aguilera TA, Jiang T, Ellies LG, Nguyen QT, Wong EH, et al. In vivo characterization  
512 of activatable cell penetrating peptides for targeting protease activity in cancer. *Integrative Biology.*  
513 2009;1(5-6):382.
- 514 38. Jodele S, Blavier L, Yoon JM, DeClerck YA. Modifying the soil to affect the seed: role of  
515 stromal-derived matrix metalloproteinases in cancer progression. *Cancer Metastasis Rev.*  
516 2006;25(1):35-43.
- 517 39. Singer CF, Kronsteiner N, Marton E, Kubista M, Cullen KJ, Hirtenlehner K, et al. MMP-2 and  
518 MMP-9 expression in breast cancer-derived human fibroblasts is differentially regulated by stromal-  
519 epithelial interactions. *Breast Cancer Res Treat.* 2002;72(1):69-77.

- 520 40. Kessenbrock K, Plaks V, Werb Z. Matrix Metalloproteinases: Regulators of the Tumor  
521 Microenvironment. *Cell*. 2010;141(1):52-67.
- 522 41. Tester AM, Ruangpanit N, Anderson RL, Thompson EW. MMP-9 secretion and MMP-2  
523 activation distinguish invasive and metastatic sublines of a mouse mammary carcinoma system  
524 showing epithelial-mesenchymal transition traits. *Clin Exp Metastasis*. 2000;18(7):553-60.
- 525 42. Crisp JL, Savariar EN, Glasgow HL, Ellies LG, Whitney MA, Tsien RY. Dual targeting of integrin  
526 alphavbeta3 and matrix metalloproteinase-2 for optical imaging of tumors and chemotherapeutic  
527 delivery. *Mol Cancer Ther*. 2014;13(6):1514-25.
- 528 43. Mc Donnell S, Chaudhry V, Mansilla-Soto J, Zeng ZS, Shu WP, Guillem JG. Metastatic and  
529 non-metastatic colorectal cancer (CRC) cells induce host metalloproteinase production in vivo. *Clin Exp*  
530 *Metastasis*. 1999;17(4):341-9.
- 531 44. Pyke C, Ralfkiaer E, Tryggvason K, Dano K. Messenger RNA for two type IV collagenases is  
532 located in stromal cells in human colon cancer. *Am J Pathol*. 1993;142(2):359-65.
- 533 45. Ardi VC, Kupriyanova TA, Deryugina EI, Quigley JP. Human neutrophils uniquely release TIMP-  
534 free MMP-9 to provide a potent catalytic stimulator of angiogenesis. *Proc Natl Acad Sci U S A*.  
535 2007;104(51):20262-7.
- 536 46. Panni RZ, Linehan DC, DeNardo DG. Targeting tumor-infiltrating macrophages to combat  
537 cancer. *Immunotherapy*. 2013;5(10):1075-87.
- 538 47. Li F, Ulrich M, Jonas M, Stone IJ, Linares G, Zhang X, et al. Tumor-Associated Macrophages  
539 Can Contribute to Antitumor Activity through FcgammaR-Mediated Processing of Antibody-Drug  
540 Conjugates. *Mol Cancer Ther*. 2017;16(7):1347-54.
- 541 48. Buckel L, Savariar EN, Crisp JL, Jones KA, Hicks AM, Scanderbeg DJ, et al. Tumor  
542 radiosensitization by monomethyl auristatin E: mechanism of action and targeted delivery. *Cancer Res*.  
543 2015;75(7):1376-87.

544

545

546 **Supporting Information**

547

548 **Table S1.** Breeding results for production of MMP-2 and -9 double KO mice. \*  $p < 0.05$  Chi-square test.

549 The number of pups reflects those surviving to weaning at 3 weeks of age.

550

551 **Figure S1. Growth is compromised in DKO mice.** A. Average body weights of wild type (WT) and  
552 double KO (DKO) mice. B. Average body weights of WT and DKO female mice with individual body  
553 weights of DKO females on the right. Data are means  $\pm$  SEM analyzed by t tests using the Holm-Sidak  
554 correction for multiple comparisons. N = 7-14 mice per group. \*  $p < 0.001$

555

556 **Figure S2. MMP-2 and -9 deletion was confirmed by RT-PCR.** Semi-quantitative RT-PCR showing  
557 the gene expression of a panel of MMPs. MMP-2/-9 are the only MMPs with significant differences  
558 between the WT and DKO tumors. N = 6 tumors from PyVmT;WT or PyVmT;DKO mice. Data are box  
559 and whisker plots with min and max, \*\*  $p < 0.01$ , Mann-Whitney test.

560

561 **Table S2. Oligonucleotides**

562

563 **Figure S3. Neutrophil infiltration in WT and DKO tumors.** A. Immunohistochemistry for neutrophil  
564 staining (NIMP-R14 antibody) of tumor sections with no primary antibody (control) as well as in WT-T in  
565 WT-M and DKO-M. B. The brown staining neutrophils from immunostained tumor sections were  
566 counted and represented per mm<sup>2</sup> of tumor area (4-6 sections/group). Data are means  $\pm$  SEM  
567 analyzed by Student's t test.



**A**

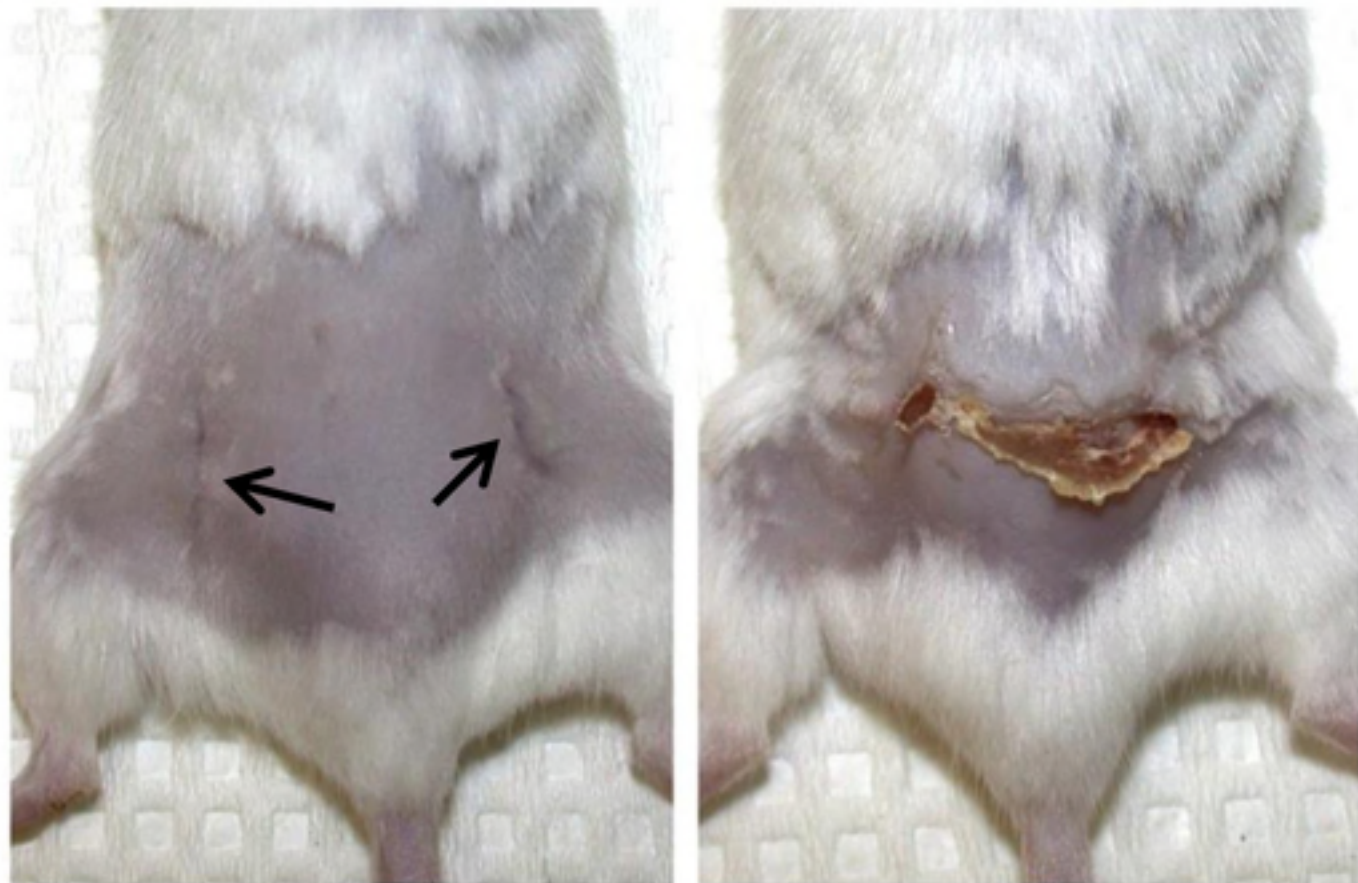

**B**

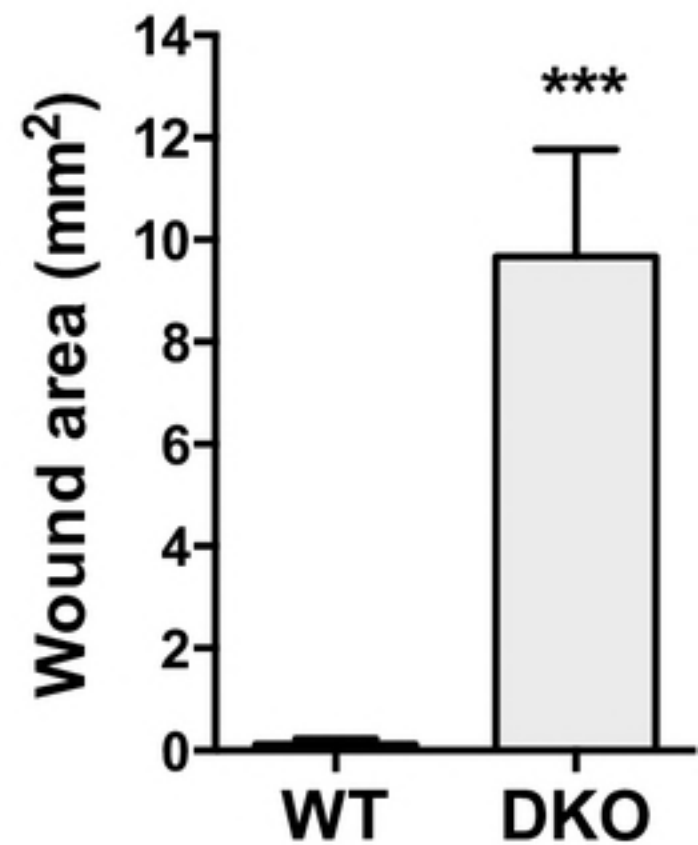

**C**

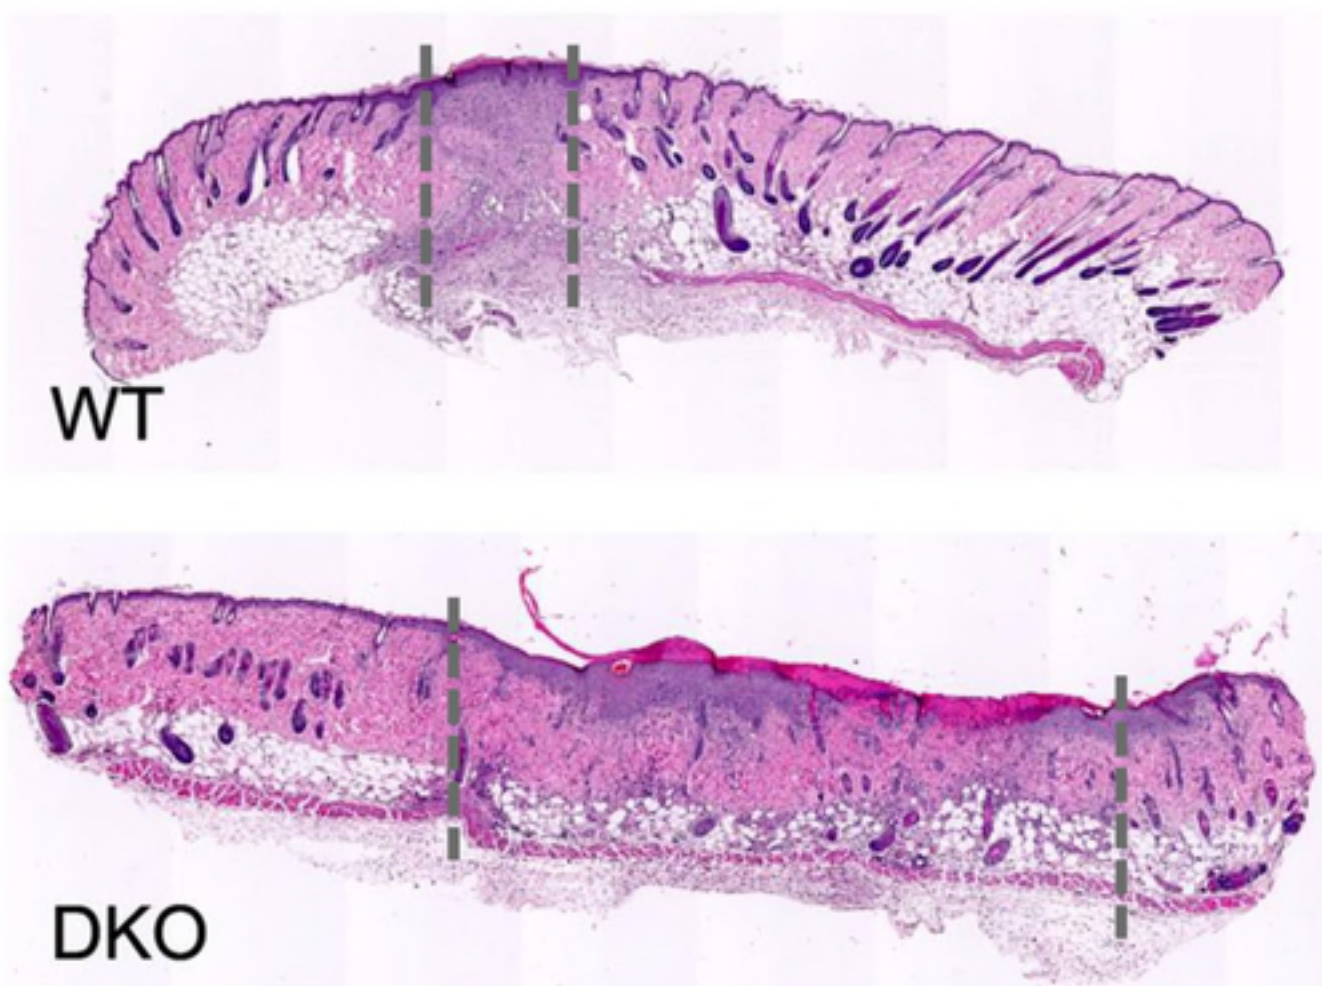

**D**

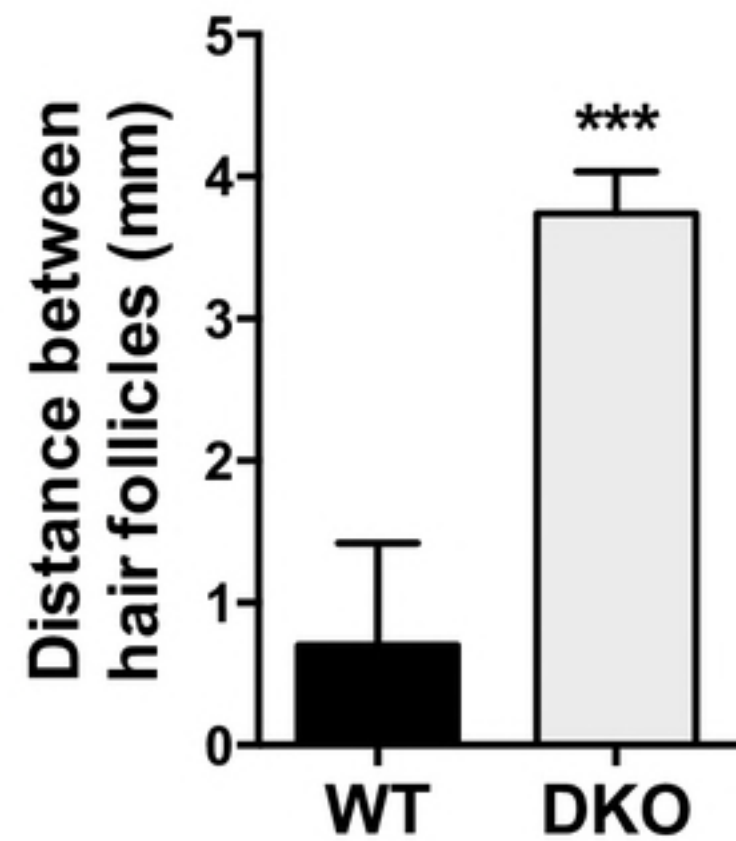



**A**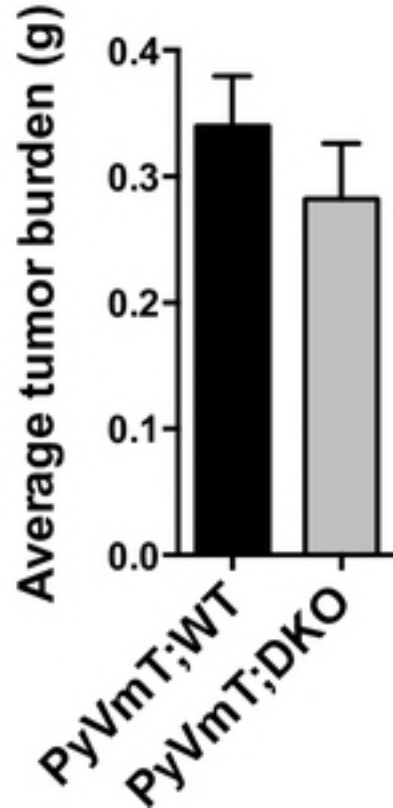**B**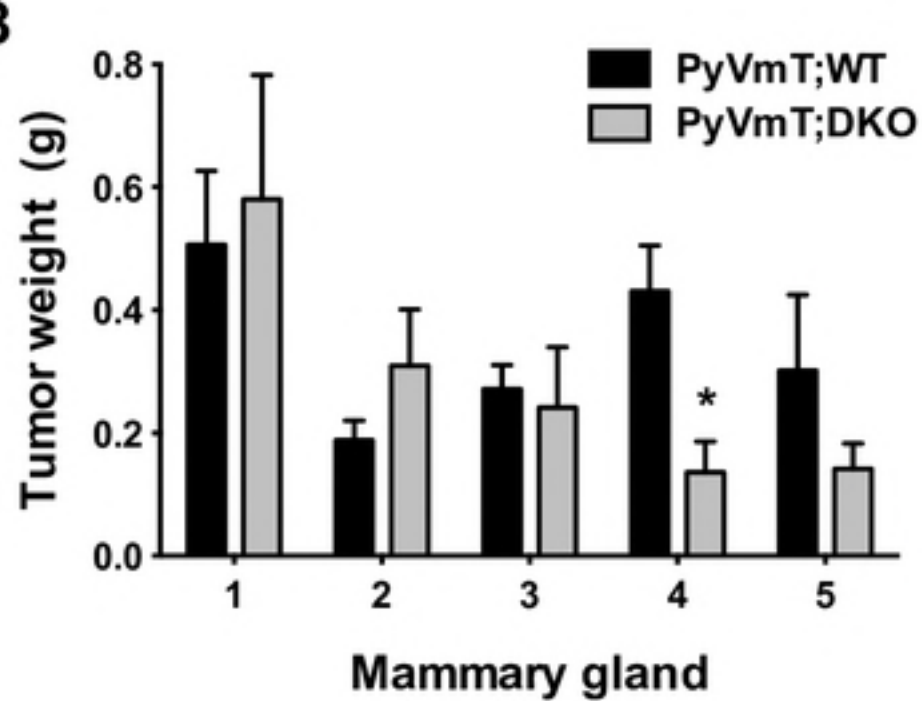**C**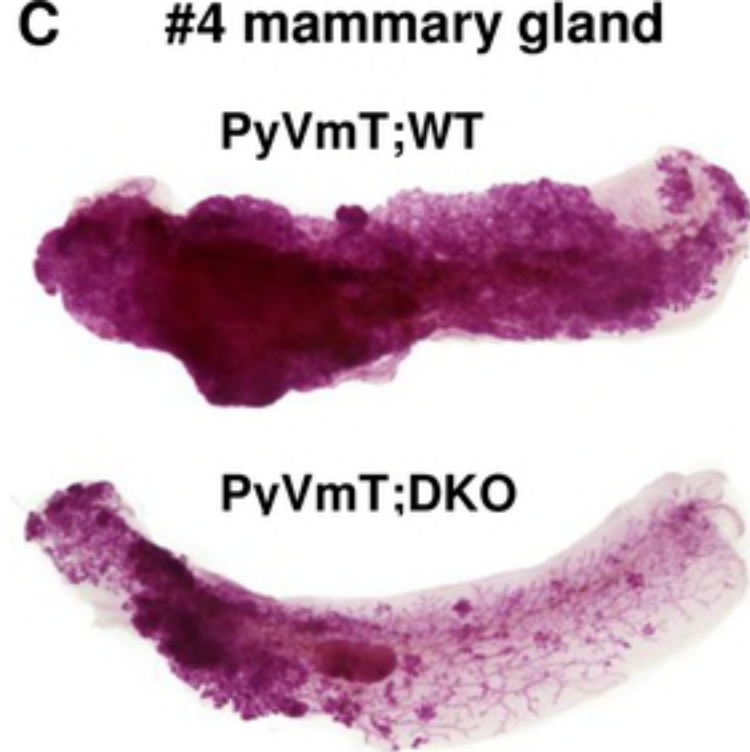

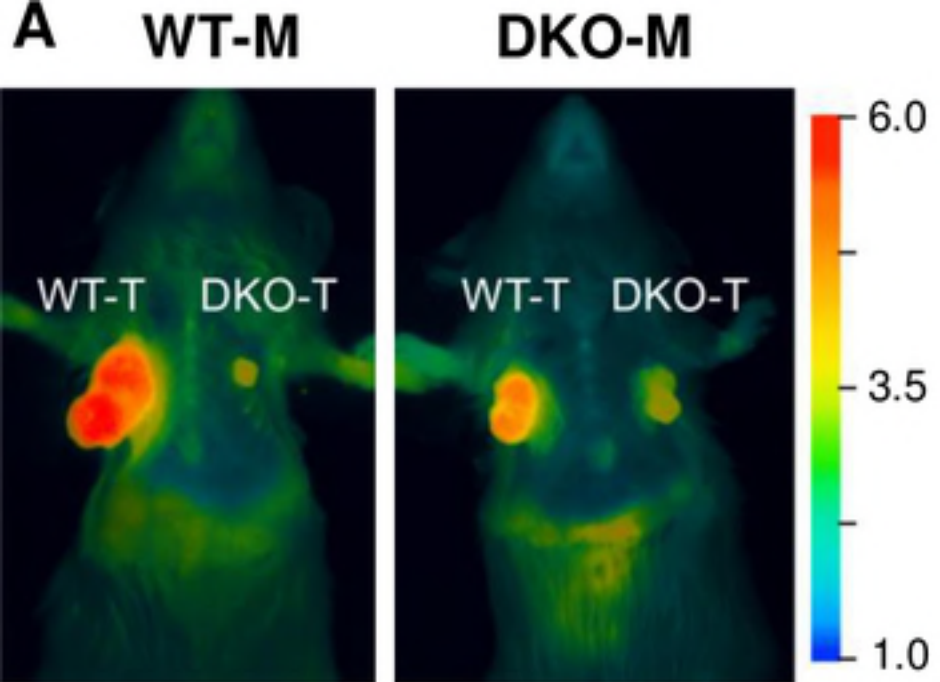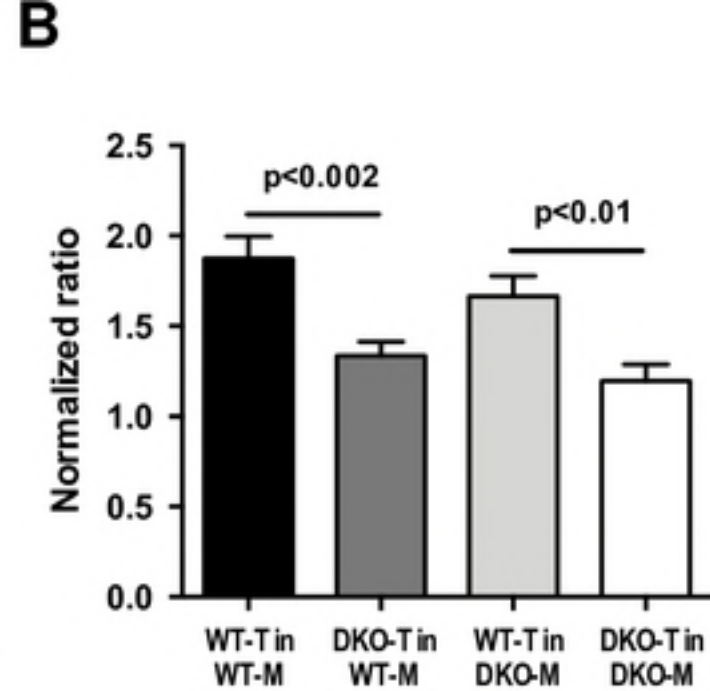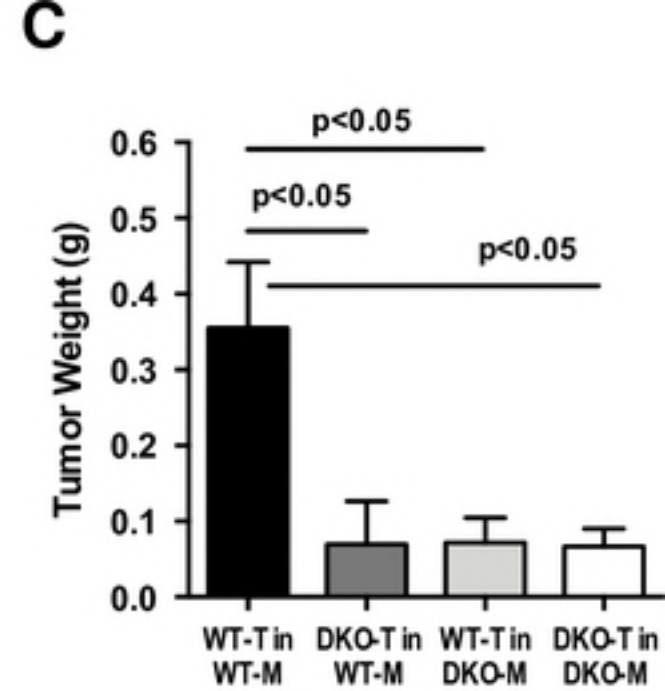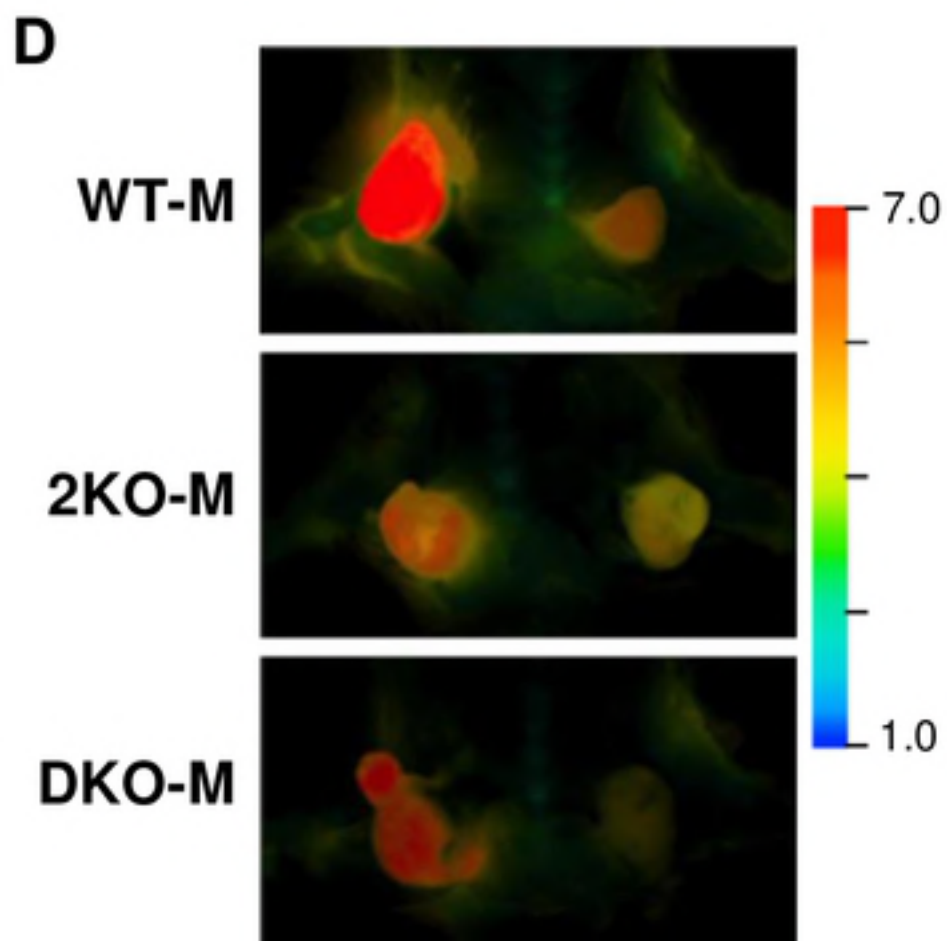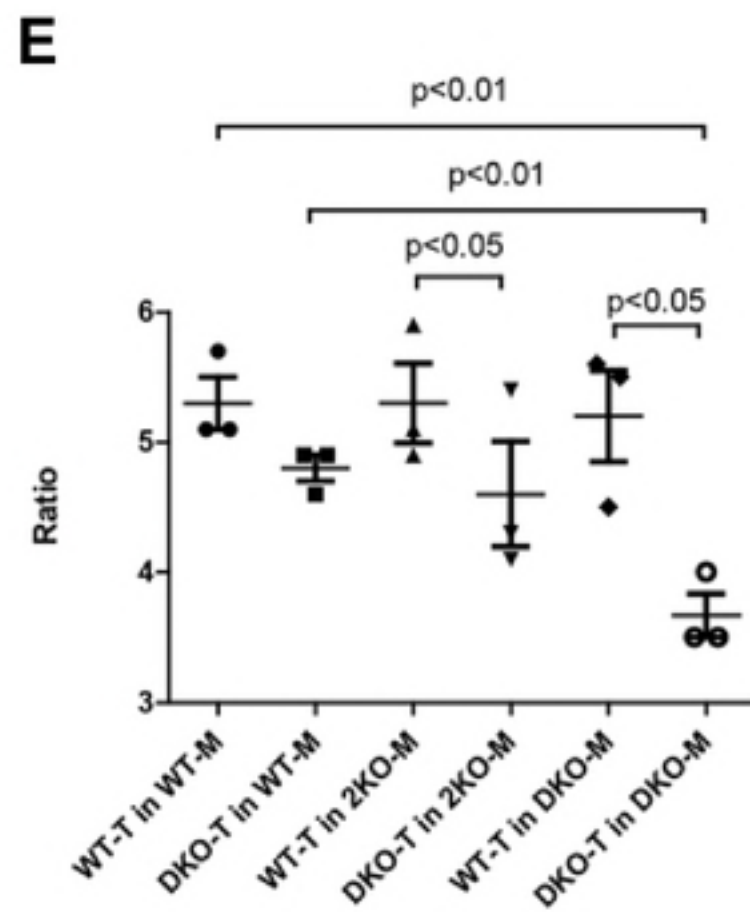

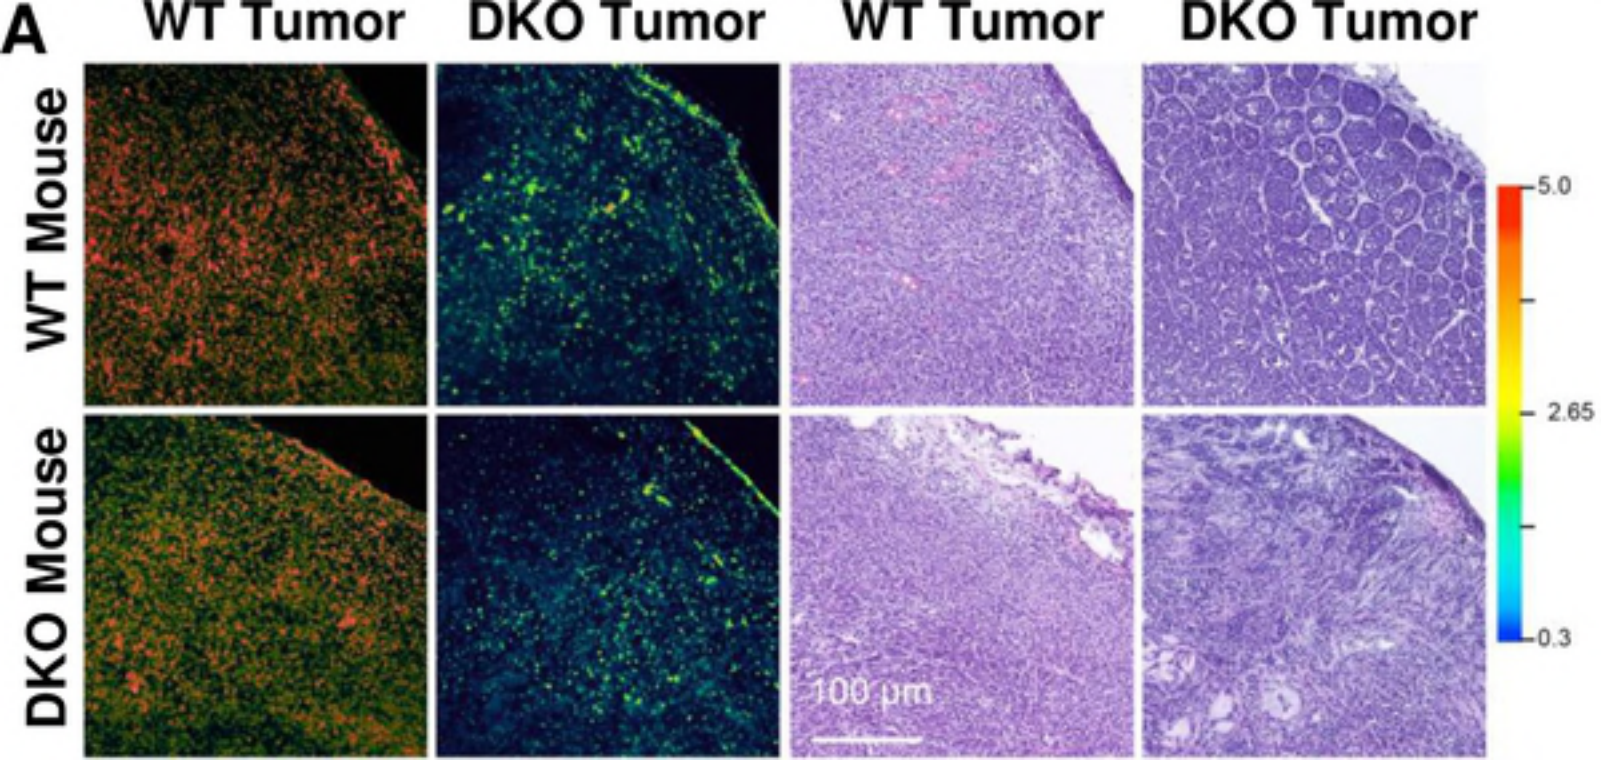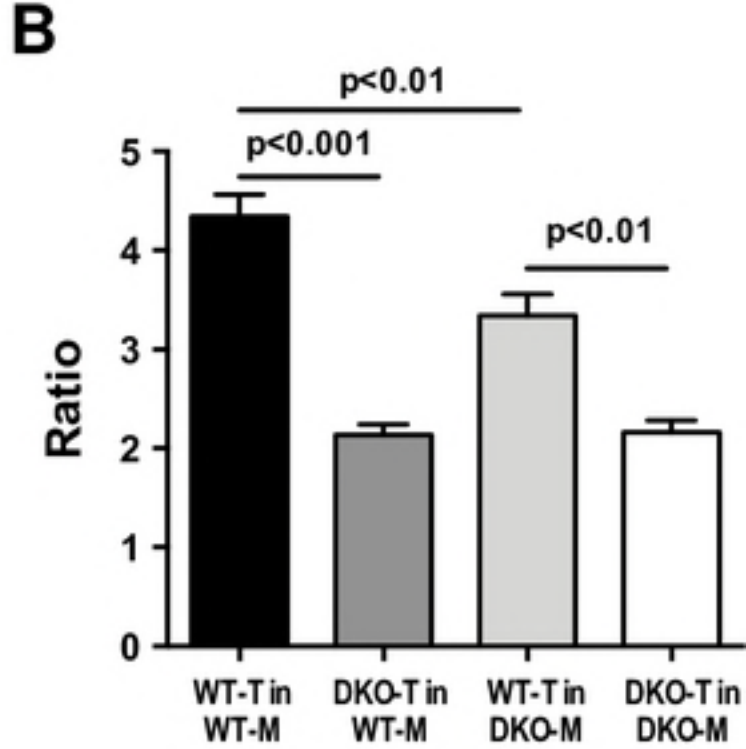



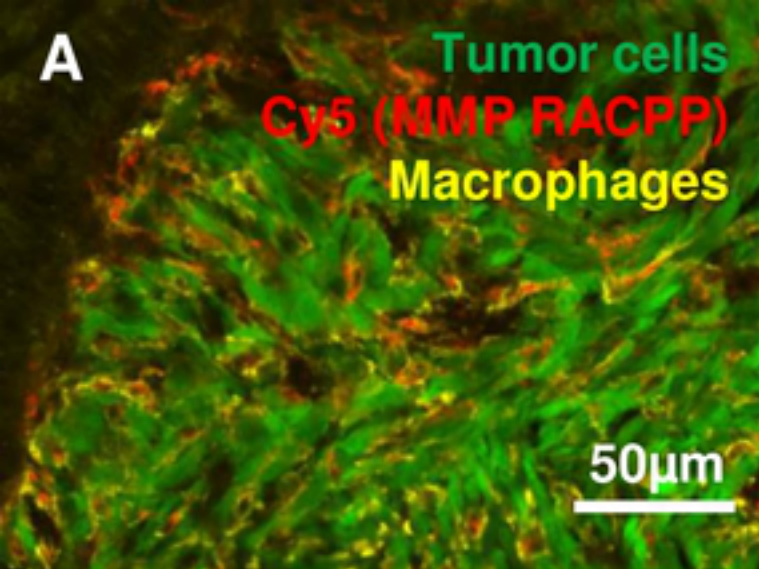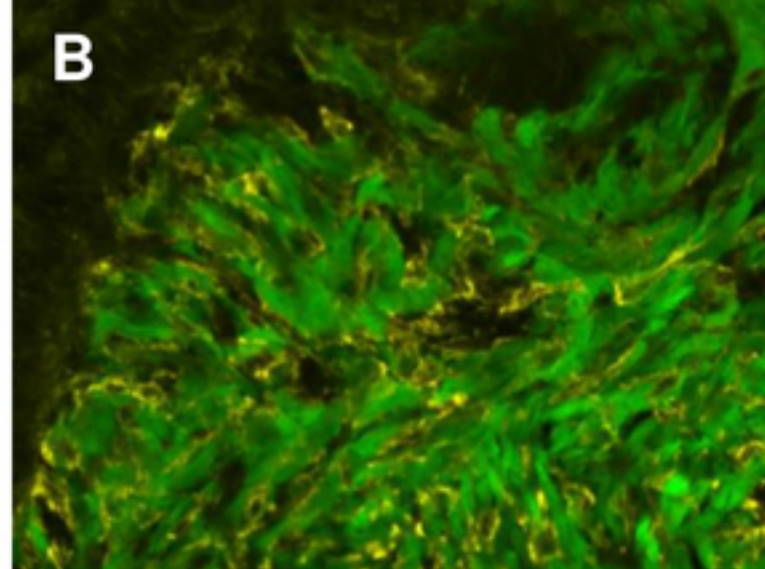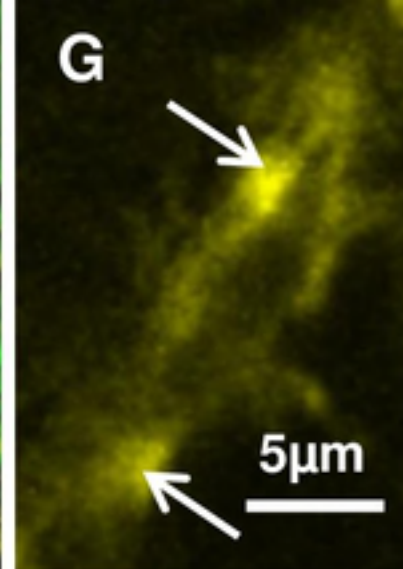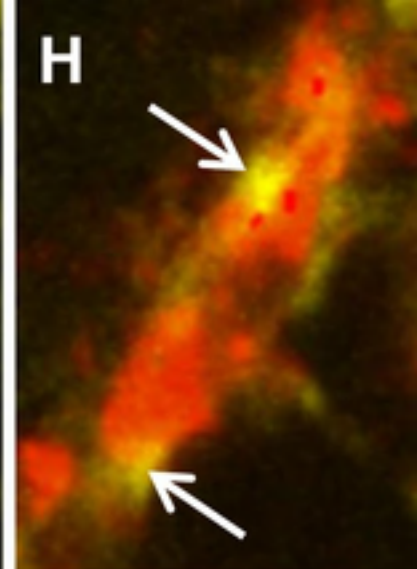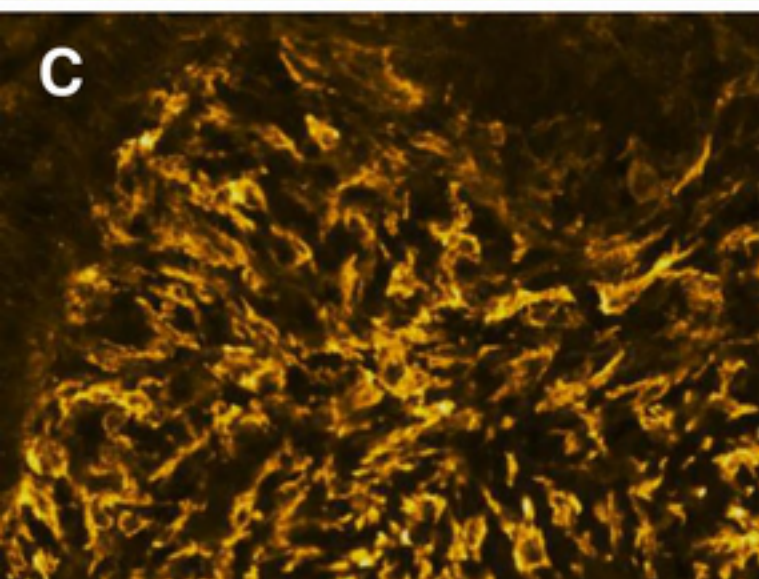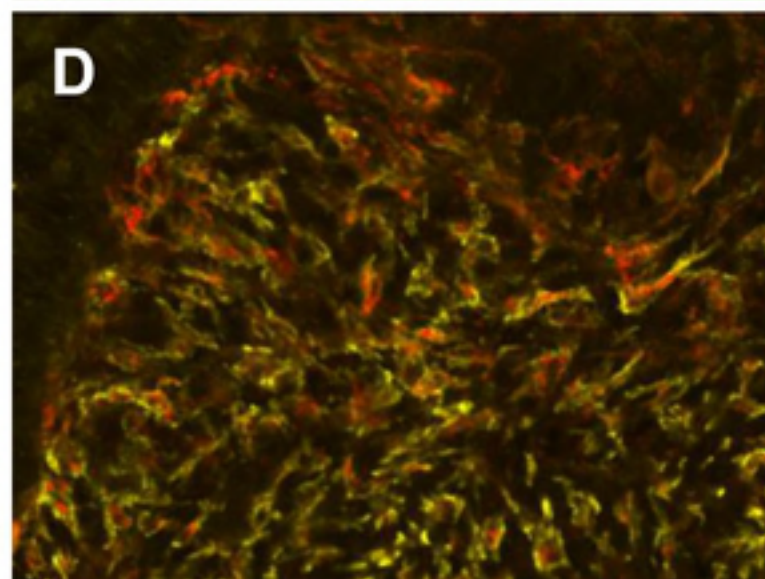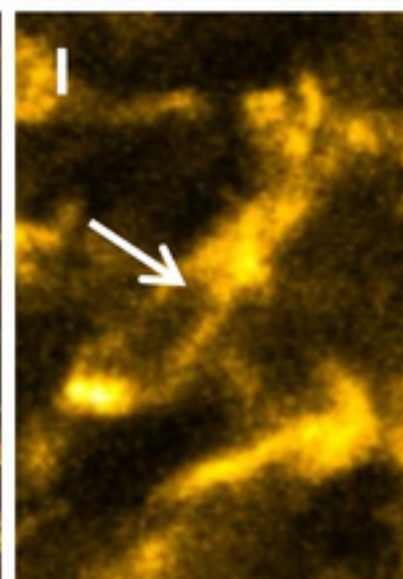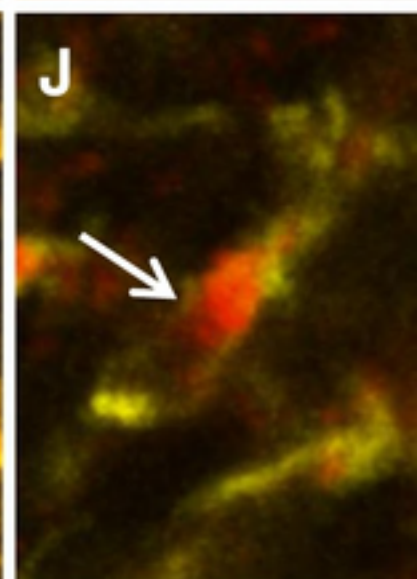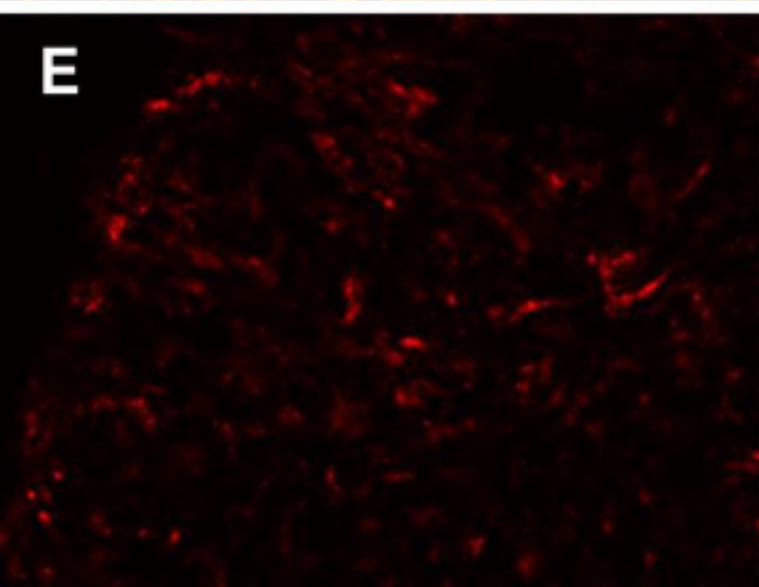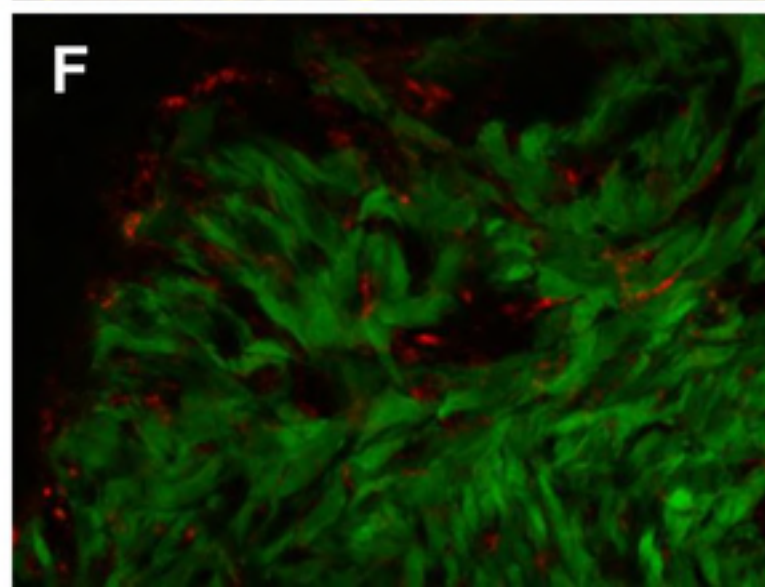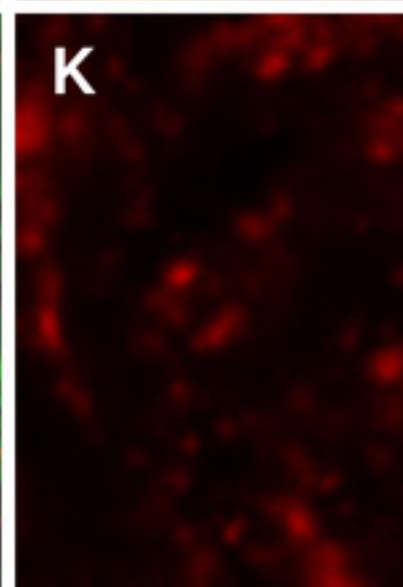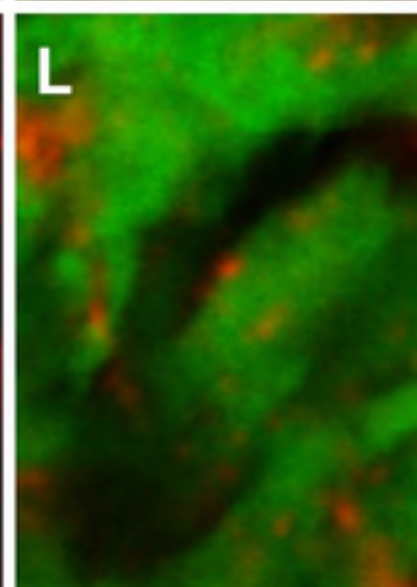



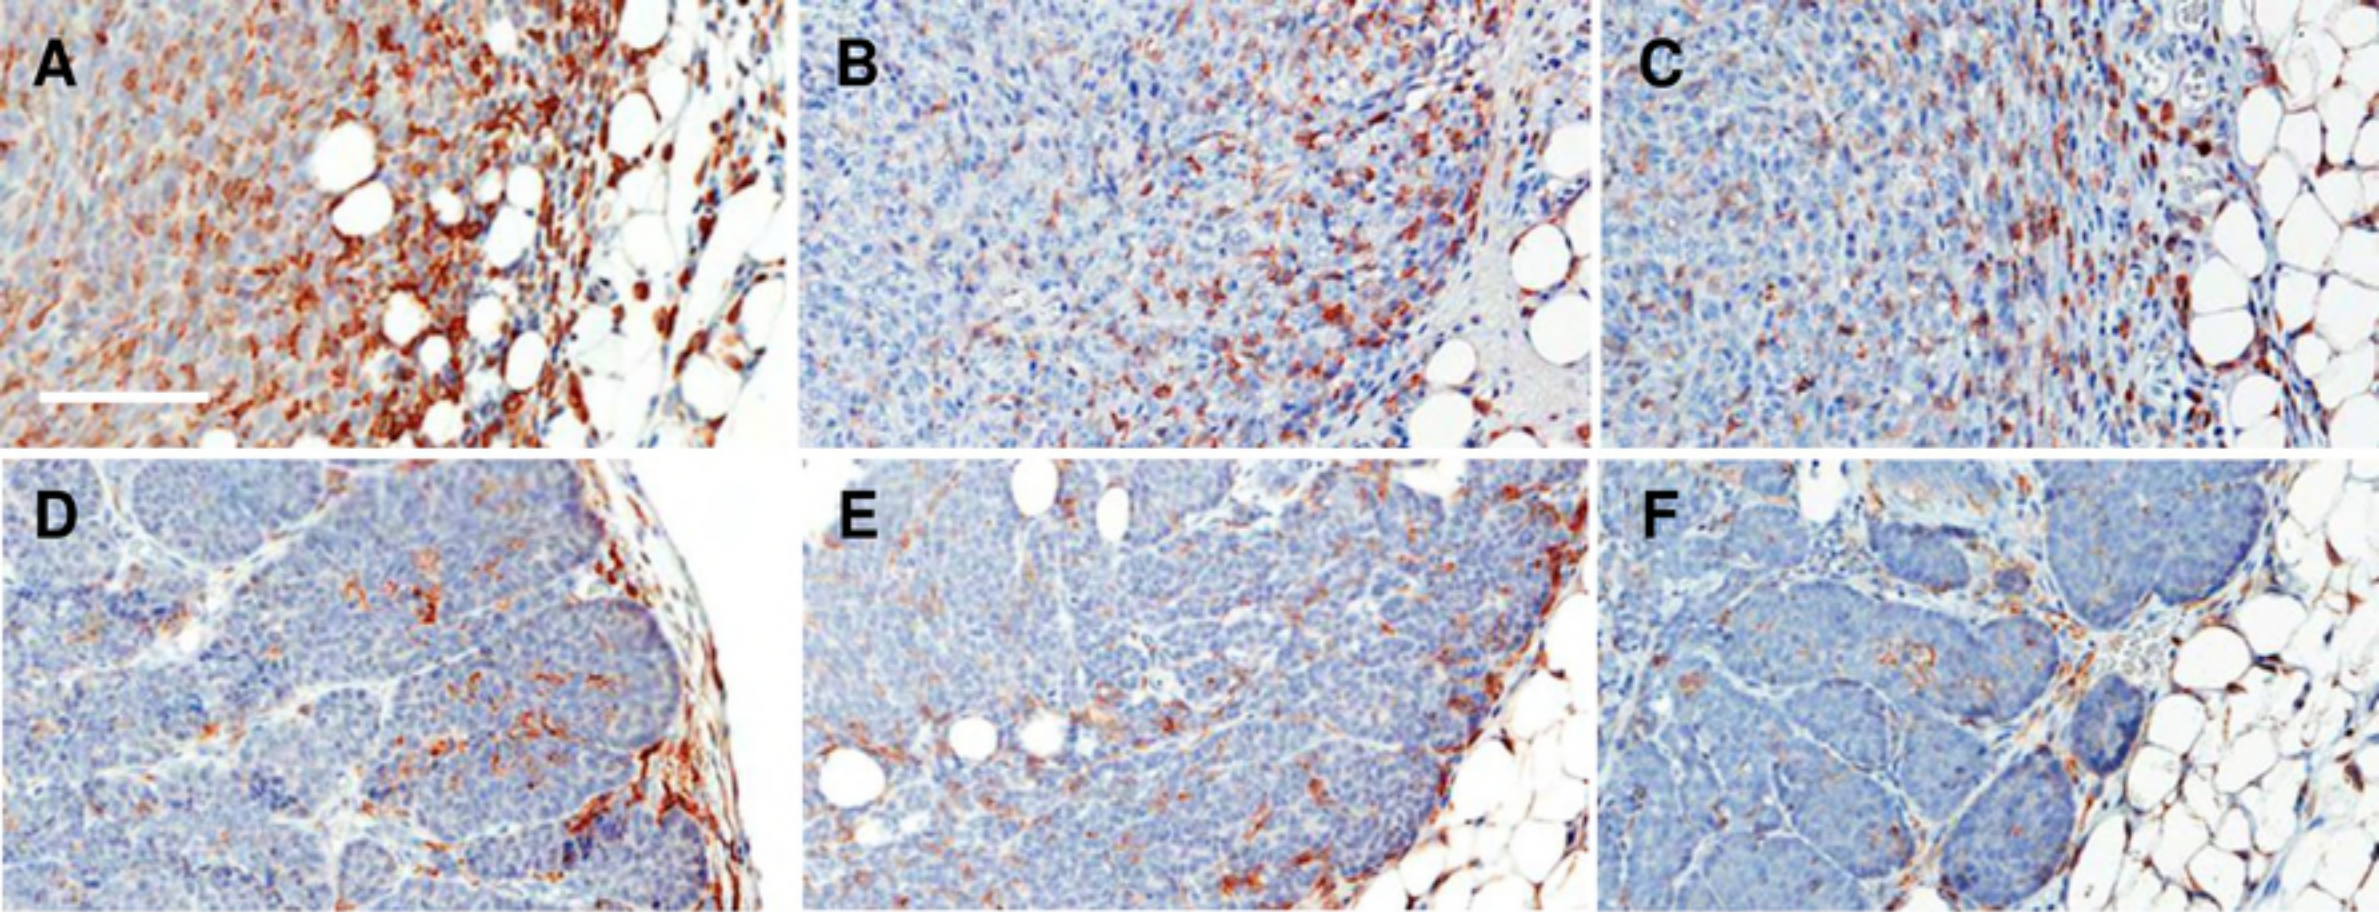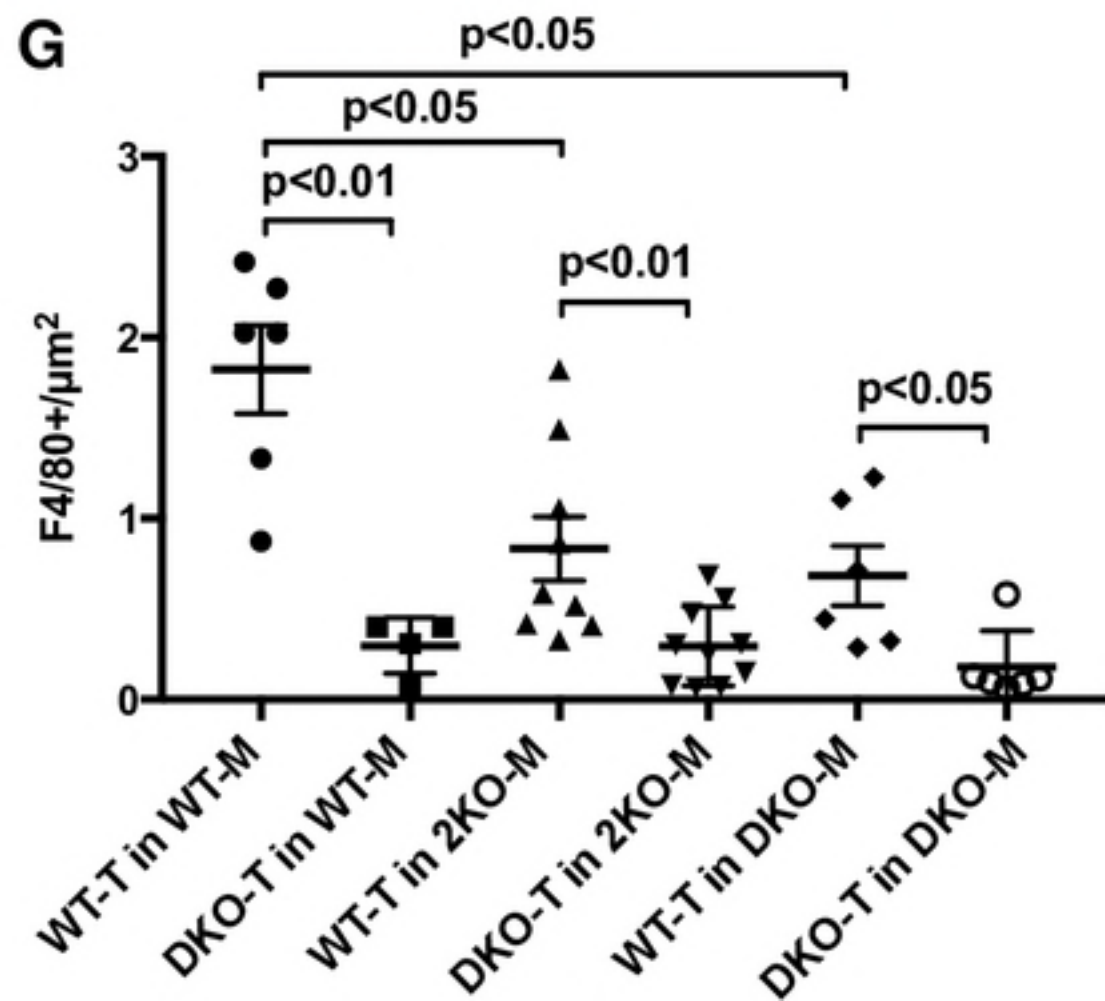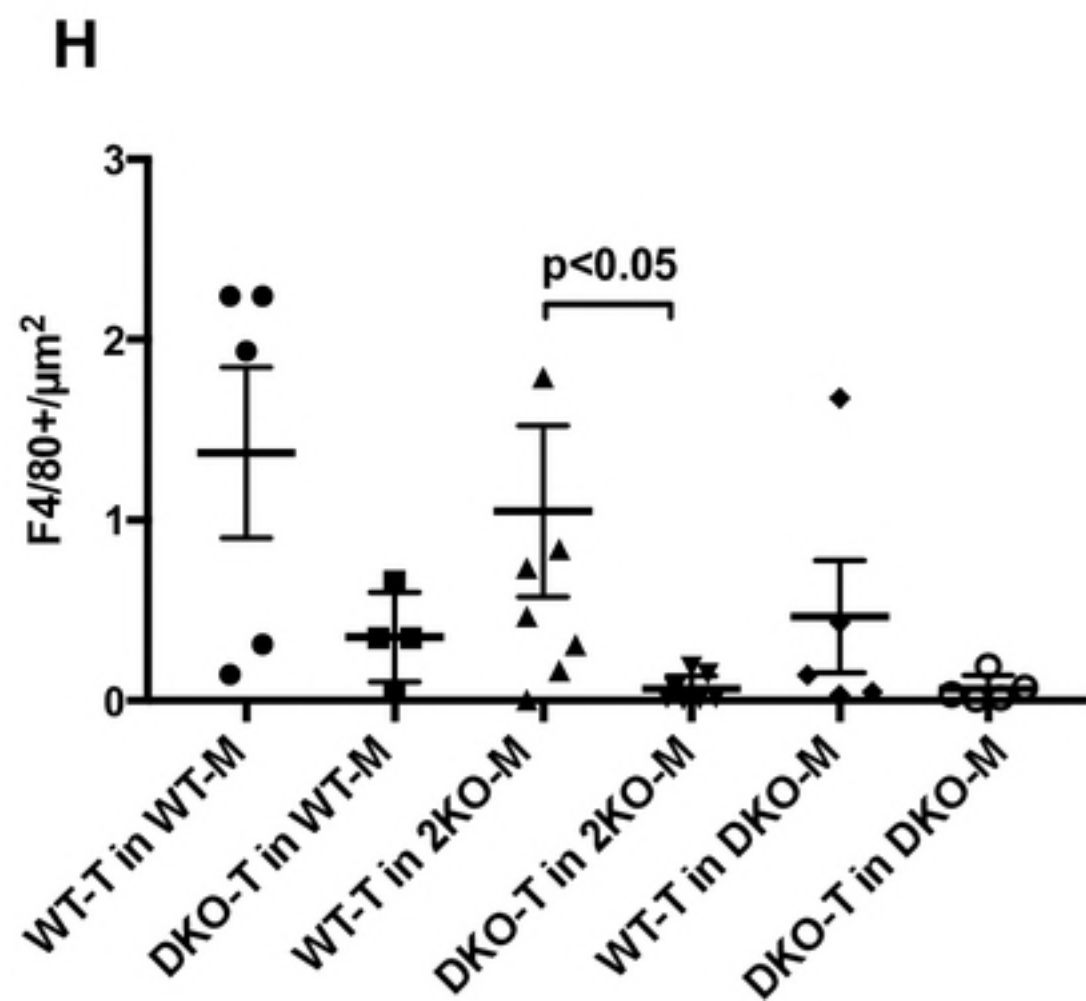

Source: http://biorxiv.org/content/10.1101/327791v1.full.pdf
